1 **Cambium-specific Transcriptome Analysis of Paulownia to Study the Molecular Impacts of**  
2 **Winter and Spring Seasons on Tree Growth**

3

4 Zachary D Perry<sup>1†</sup>, Thangasamy Saminathan<sup>2†</sup>, Alok Arun<sup>3</sup>, Brajesh N Vaidya<sup>1</sup>, Chhandak  
5 Basu<sup>4</sup>, Umesh K Reddy<sup>2\*\*</sup>, and Nirmal Joshee<sup>1\*\*</sup>

6 <sup>1</sup>Agricultural Research Station, Fort Valley State University, Fort Valley, GA 31030

7 <sup>2</sup>Gus R. Douglass Institute and Department of Biology, West Virginia State University, Institute,  
8 WV, United States

9 <sup>3</sup>Institute of Sustainable Biotechnology, Inter American University of Puerto Rico, Barranquitas,  
10 00794, Puerto Rico, USA

11 <sup>4</sup>Department of Biology, California State University, Northridge, Northridge, Los Angeles,  
12 California 91330, USA

13

14

15 †Contributed equally

16 \*\*Corresponding authors

## 17 **Abstract**

18 Paulownia (*Paulownia elongata*) is a fast-growing, multipurpose deciduous hardwood  
19 species that grows in a wide range of temperatures from  $-30^{\circ}\text{C}$  to  $45^{\circ}\text{C}$ . Seasonal cues  
20 influence the secondary growth of tree stems, including cambial activity, wood chemistry, and  
21 transition to latewood formation. In this study, a *de novo* transcriptome approach was conducted  
22 to identify the transcripts expressed in vascular cambial tissue from senescent winter and actively  
23 growing spring seasons. Illumina paired-end sequenced cambial transcriptome generated  
24 297,049,842 clean reads which finally yielded 61,639 annotated unigenes. Based on non-  
25 redundant protein database analyses, Paulownia cambial unigenes shared highest homology  
26 (64.8%) with *Erythranthe guttata*. A total of 35,471 unigenes resulted from KEGG annotation  
27 that were mapped to 128 pathways with metabolic pathways dominated among all. Additionally,  
28 DEG analysis showed that 2,688 and 7,411 genes were significantly upregulated and  
29 downregulated, respectively in spring compared to winter. Interestingly, quite a number of  
30 transcripts belonging to heat shock proteins were upregulated in spring season. RT-qPCR  
31 expression results of fifteen wood-forming candidate genes involved in hemicellulose, cellulose,  
32 lignin, auxin and cytokinin pathways showed that the hemicellulose genes (*CSLCA*, *FUT1*,  
33 *AXY4*, *GATL1*, and *IRX19*) were significantly upregulated in spring season tissues when  
34 compared to winter tissues. In contrast, lignin pathway genes *CCR1* and *CAD1* were upregulated  
35 in winter cambium. Finally, a transcriptome-wide marker analysis identified 11,338 Simple  
36 Sequence Repeat (SSRs). The AG/CT dinucleotide repeat predominately represented all SSRs.  
37 Altogether, the cambial transcriptomic analysis reported here highlights the molecular events of  
38 wood formation during winter and spring. The identification of candidate genes involved in the  
39 cambial growth provides a roadmap of wood formation in Paulownia and other trees for the  
40 seasonal growth variation.

## 41 **Keywords**

42 Paulownia; Cambium; Transcriptome; Winter Season; Spring Season; Tree Growth

## 43 Introduction

44 Paulownia (*Paulownia elongata*) is an extremely fast-growing woody plant reaching up  
45 to 20 feet in one year when young. Some species of *Paulownia* when in plantation can be  
46 harvested for saw timber in as little as five years. The genus *Paulownia* consists of nine species  
47 of deciduous, fast growing, multi-purpose, and hardwood trees (Zhu *et al.*, 1986) and have long  
48 been shown to be extremely adaptive to wide environmental variations in both edaphic and  
49 climatic factors, as well as being capable of growing on marginal lands (Clatterbuck and Hodges,  
50 2004; Sedeer and Nabil, 2003). *Paulownia* species are native to Asia from China, Laos, and  
51 Vietnam and grown in Japan and Korea. It has been cultivated in Australia, Europe, and both  
52 North and Central America. Ten-year-old Paulownia tree in natural conditions can attain 30–40  
53 cm in diameter at breast height (DBH) and a timber volume of 0.3–0.5 m<sup>3</sup> (Zhu *et al.*, 1986).  
54 Craftsman in Japan and other countries have used this valuable wood to create intricate carvings,  
55 surfboards, musical instruments, toys, and furniture. Paulownia wood has a high ignition point of  
56 420–430 °C compared to other hardwoods which range generally from 220–225 °C (Akyildiz and  
57 Kol Sahin, 2010). The wood of Paulownia has also been shown to be fire retardant (Li and Oda,  
58 2007) as it burns at much higher temperature in comparison to many other wood species.  
59 Paulownia bears abundant flowers that are highly nectariferous and yield premium honey (Yadav  
60 *et al.*, 2013) adding to the rural economy. By adding Paulownia wood flour (25–40%) to plastics,  
61 an attractive, equally strong, environmentally agreeable, and economically important  
62 biocomposite can be produced (Tisserat *et al.*, 2013a; Tisserat *et al.*, 2013b, 2015) that can serve  
63 many industries. In addition, due its light weight and strong nature of wood, it is attracted by  
64 music industry to make soundboards of stringed musical instruments such as the guqin, guzheng,  
65 pipa, koto, gayageum and electric guitars. Biochar produced from Paulownia is also a desirable  
66 organic soil amendment which allows the growth of beneficial microbes in the porous holes of  
67 the biochar (Vaughn *et al.*, 2015). Recently, researchers found its potential use as an animal feed  
68 resource (Stewart *et al.*, 2018).

69 Wood synthesis provides one of the most important sinks for atmospheric carbon dioxide  
70 (Ye and Zhong, 2015). Wood formation is a result of the regulated accumulation of secondary  
71 xylem cells (fibers, vessels, and rays in dicots) differentiated from the vascular cambium that  
72 involves wall thickening. This wall thickening is accompanied by the biosynthesis of wall

73 components, lignin, cellulose, and hemicelluloses, and it is terminated by programmed cell death  
74 (Samuels *et al.*, 2006; Song *et al.*, 2006). In order to survive for multiple growing seasons,  
75 perennial plant species have adapted a dormancy regulation system which allows active growth  
76 during the desirable time of year, and vegetative dormancy when climatic conditions are  
77 unfavorable for growth (Shim *et al.*, 2014). Being one of the fastest growing tree species, a  
78 Paulownia tree is capable of producing ~45 kg/tree in the first growing year and ~90 kg/tree at  
79 the end of second year (Joshee, 2012). Paulownia being a perennial tree, harvest is not limited to  
80 a small seasonal window but can be conducted year-round with proper management practices.  
81 Another beneficial property of Paulownia is coppicing, the production of multiple sprouts from a  
82 stump after the removal of the tree or shrub. Harvest cycles of 2–3 years could be implemented  
83 to establish a short rotation fast growing bioenergy crop. Since Paulownia is a short rotation and  
84 fast-growing perennial tree, it serves as a good candidate for the production of lignocellulosic  
85 biofuel which can eliminate dependence on fossil fuel. Further, trees may also have a benefit as  
86 stable wildlife habitat because they are not disturbed by annual harvests.

87 *Arabidopsis thaliana* has been used widely as a model system for secondary growth.  
88 However, the drawback to using *Arabidopsis* is the fact that it is an herbaceous plant, lacking  
89 secondary growth. In order to combat this feature, mutant lines were developed which have  
90 phenotypes exhibiting secondary growth characteristics. Initial studies used *A. thaliana*  
91 microarrays to determine the differential expression of transcripts related to secondary growth  
92 (Ko and Han, 2004; Oh *et al.*, 2003). The next generation of studies utilized expressed sequence  
93 tags (ESTs) to determine a genomic “snap shot” of how wood is formed (Moreau *et al.*, 2005;  
94 Schrader *et al.*, 2004). Transcriptome analyses of various tree species indicate involvement of  
95 receptor kinases, transcription factors, and secondary wall biosynthesis genes that are highly  
96 expressed in wood-forming cells (Aspeborg *et al.*, 2005; Dharmawardhana *et al.*, 2010; Pavy *et*  
97 *al.*, 2008; Wang *et al.*, 2009; Wilkins *et al.*, 2009).

98 In the recent past, scientific research addressing Paulownia transcriptomics have been  
99 accumulated. However, focus of the studies has been on drought tolerance, and the analysis of a  
100 phytoplasma that causes Witches Broom Disease (Dong *et al.*, 2014a, b; Mou *et al.*, 2013).  
101 Comparative analysis of microRNA expression (Cao *et al.*, 2018a), regulation of long noncoding  
102 RNAs (Fan *et al.*, 2018), and genome-wide analysis of lncRNAs (Cao *et al.*, 2018b) provided

103 comprehensive transcriptome analyses with *phytoplasma* infection. Transcriptome sequencing  
104 and a *de novo* assembly approach were together used to analyze gene expression profiles in *P.*  
105 *fortunei* infected by *Phytoplasmas* (Fan *et al.*, 2014). Studies have been carried out to analyze the  
106 variations between *Paulownia tomentosa* and its autotetraploid counterpart to characterize the  
107 differential expression of unigenes (Fan *et al.*, 2015) and microRNA expression under drought  
108 stress (Zhao *et al.*, 2018). An investigation into the physiological alterations of *P. fortunei* x *P.*  
109 *tomentosa* in response to infection by Paulownia witches' broom (PaWB) (*Phytoplasma spp.*), a  
110 pathogenic bacteria responsible for crop losses worldwide, was conducted by differential  
111 expression analysis of RNA-seq data of infected vs. pathogen free specimens (Mou *et al.*, 2013).  
112 Another study investigated the expression of unigenes derived from Witches' broom infected *P.*  
113 *tomentosa* x *P. fortunei* by a *De novo* assembled transcriptome (Liu *et al.*, 2013). Recently,  
114 transcriptome and small RNA sequencing analysis revealed roles of PaWB-related miRNAs and  
115 genes in *Paulownia fortunei* (Li *et al.*, 2018). An investigation into the miRNAs related to the  
116 regulation of gene expression in both *P. australis* diploid and autotetraploid genotypes was  
117 performed by sequencing of small RNA libraries for the two respective genotypes (Niu *et al.*,  
118 2014). Experimentation by (Li *et al.*, 2014) identified the genes related to a synthesized  
119 autotetraploid of *P. tomentosa* x *P. fortunei*, which exhibits advanced characteristics such as  
120 greater yield and higher resistance than the diploid wild type tree.

121 Cambial development, the initiation and activity of the vascular cambium, leads to an  
122 accumulation of wood, the secondary xylem tissue. Seasonal cues play a significant role in  
123 determining cambial growth as perennial plants growing in temperate and high-latitude regions  
124 show termination of cell division in the meristems (Nitsch, 1957) and reversal of growth arrest  
125 during long days (Espinosa-Ruiz *et al.*, 2004). Time-coursed transcriptome analysis identified  
126 participation and modulation of hormone-related genes; IAA, ARF and SAURs were  
127 downregulated and circadian genes including PIF3 and PRR5 were upregulated (Wang *et al.*,  
128 2019). Transcriptome data from the same tissue/s at different time points or of different  
129 physiological conditions were compared to one another to elucidate the gene expression pattern  
130 to each treatment. Interconnected signaling profiles between cytokinin and auxin indicated that  
131 they displayed distinct distribution across the cambium with increased cytokinin content to  
132 stimulate cell division (Immanen *et al.*, 2016). Interestingly, cambial zone in addition to  
133 showing elevated cambial cytokinin level, the cambial auxin concentration and auxin-responsive

134 gene expression were also increased. In Paulownia, by investigating the differential expression of  
135 vascular cambium, the site of lateral growth and xylem production (Nieminen *et al.*, 2015), tissue  
136 during wood-forming spring and senescent fall seasons, the transcripts which influence the  
137 production of wood in *P. elongata* were determined. Recent study provided evidence for the  
138 involvement of microRNAs in *Paulownia tomentosa* cambial tissues in response to seasonal  
139 winter and summer changes (Qiu *et al.*, 2018).

140 Transcriptomic analyses have been carried out to profile gene expression regulations for  
141 biotic and abiotic stresses, and growth responses. However, to the best of our knowledge no  
142 study has described how the gene expression profile changes in woody tissues under seasonal  
143 variations. In this study, we sequenced and analyzed the transcriptomes of cambium tissues  
144 collected during winter and spring seasons to assess the impact of two seasons on biomass. A  
145 transcriptome-wide analysis identified 61,639 annotated unigenes, and 2,688 and 7,411  
146 transcripts were up- and downregulated, respectively in spring season. Interestingly, among  
147 selected wood-forming genes, hemicellulose-specific genes were upregulated in spring. Finally,  
148 11,338 Simple Sequence Repeat (SSRs) were identified from the transcriptome data. The  
149 identification of genes and pathways involved in cambial growth will be useful to further  
150 investigate the regulation of wood formation in Paulownia and other trees.

151

## 152 **Materials and Methods**

### 153 *Collection of Cambium Tissues and RNA Isolation*

154 Samples were randomly selected from trees at the FVSU Paulownia bioenergy plot  
155 located at 32° 31'15.04" N and 83° 52'12.95" W. Samples were taken in triplicates during two  
156 two seasonal points, each seasonal point representing a different physiologic state. The first  
157 sample (Winter Wood – hereafter referred as WW) was collected in March, 2015 and  
158 represented the senescent winter wood (Figure 1A). The second sample (Spring Wood –  
159 hereafter referred as SW) was collected in May, 2015 and was representative of the actively  
160 growing spring wood (Figure 1B). Samples were harvested from twigs which were located at a  
161 height of 1.0–1.5 m from the ground, and having a diameter of 2.0–3.0 cm. Since Paulownia has  
162 an opposite branching pattern, the Spring and Winter samples were taken from the same node  
163 positioned on opposite sides. Sections of limb (15–30 cm long) were collected by removing the  
164 selected limb section with an ethanol (70 %) solution and RNaseZap® (Ambion, Foster City,  
165 CA, USA) treated pruner and gloved hands. The samples were labeled, wrapped in aluminum  
166 foil, flash frozen in liquid nitrogen, and subsequently stored in a -80 °C freezer until further use.  
167 Biological replicates were labelled as WW1, WW2 and WW3 for winter, and SW1, SW2, and  
168 SW3 for spring, respectively.

169 For high quality intact total RNA extraction, vascular cambium tissues were harvested  
170 from the frozen samples by first slicing a shallow, longitudinal, cut into the outer bark with a  
171 sterile scalpel (Figure 1C). The bark was then removed using sterile forceps in a large, single  
172 piece. The frozen green vascular cambium was then gently scraped from the wood below, into  
173 small strips using a sterile scalpel. One hundred milligrams (100 mg) of vascular cambium tissue  
174 was finely powdered in microvials containing zirconia beads (BioSpec, Bartlesville, OK, USA)  
175 and 550 µL of TRIzol reagent (Invitrogen, Carlsbad, CA, USA) in a MagNA Lyser (Roche,  
176 Basel, Switzerland) as described in (Saminathan *et al.*, 2014). Finally, RNA was purified using  
177 Direct-Zol™ RNA mini-prep kit (Zymo Research, Irvine, CA, USA) and any traces of genomic  
178 DNA contamination was removed using enzymatic DNase I treatment. RNA quality and quantity  
179 were analyzed using NanoDrop 1100 (NanoDrop, Wilmington, DE, USA) and Agilent 2100  
180 Bioanalyzer (Agilent, Santa Clara, CA, USA).



181 *cDNA Synthesis and RNA Sequencing*

182 RNA samples for each biological replicate from both treatments (a total of 6 samples)  
183 were sequenced at BGI International (<http://bgi-international.com/>) sequencing platform with  
184 standard protocol. Magnetic beads coated with Oligo (dT) were used to isolate mRNA from the  
185 total RNA. Using a proprietary fragmentation buffer, the full-length mRNA transcripts were then  
186 fragmented into smaller pieces. Next, cDNA was synthesized using random hexamer primers and  
187 the mRNA fragments as templates. Short fragments were then purified and resolved with EB  
188 buffer for end preparation and single nucleotide A (adenine) addition. The short fragments were  
189 then connected with sequencing adapters. For quality control purposes the Agilent 2100  
190 Bioanalyzer and ABI StepOnePlus Real-Time PCR system were used in quantification and  
191 qualification of the prepared sample library. Finally, sequencing was performed on the Illumina  
192 HiSeq 2000 platform.

193 *Assembly of Libraries, Data Analysis and Annotation*

194 The raw reads generated from pair-end sequencing are stored in fastq format and usually  
195 are contaminated with adapters, unknown or low-quality sequences which were removed by BGI  
196 proprietary software “filter\_fq”. Once the clean reads were resolved from the raw reads, they  
197 were assembled into transcripts using Trinity (<http://trinityrnaseq.sourceforge.net/>) (Grabherr *et*  
198 *al.*, 2011). Three (*Inchworm*, *Chrysalis*, and *Butterfly*) modules in Trinity were applied  
199 sequentially to process raw RNA-seq reads into contigs and full-length transcripts known as  
200 unigenes. Inchworm (reference) was further used to assemble the clean reads into unique  
201 sequences of transcripts, known as contigs. Chrysalis clustered the Inchworm derived contigs  
202 into clusters and constructed complete de Bruijn graphs for each cluster. Butterfly then processed  
203 the individual de Bruijn graphs in parallel, tracing the paths that reads and pairs of reads take  
204 within the graph, and ultimately reporting full-length transcripts. Butterfly also determined  
205 alternatively spliced isoforms of genes. The end result of assembly are full-length transcripts  
206 known as unigenes. Open source program BLAST (<http://www.blast.ncbi.nlm.nih.gov/Blast.cgi>)  
207 compares nucleotide, amino acid, or protein sequences to annotated sequence databases and  
208 calculates the statistical significance of the homology. The unigenes were aligned with five  
209 databases: KEGG (Kyoto Encyclopedia of Genes and Genomes), COG (Clusters of Orthologous



210 Groups), NT (NCBI nucleotide database), NR (NCBI non-redundant protein database) and  
211 Swiss-Prot (Protein sequence database). The KEGG database (<http://www.genome.jp/kegg/>)  
212 (Kanehisa *et al.*, 2007) was used to perform a systematic analysis of metabolic pathways and  
213 function of gene products within a cell. By aligning with the KEGG database the annotated  
214 metabolic pathways with which the transcripts (unigenes) correspond were elucidated, allowing  
215 insight into the complex biological functions of gene families. The COG database  
216 (<http://www.ncbi.nlm.nih.gov/COG/>) classified orthologous gene products into clusters. COG  
217 clusters predicted the possible function of the transcripts. The NT database  
218 (<http://www.ncbi.nlm.nih.gov/nucleotide>) is a non-redundant nucleotide database with entries from  
219 NCBI's other databases (GenBank, EMBL, and DDBJ) and offers another way to predict  
220 transcript function. Both NCBI's NR database and the Swiss-Prot  
221 (<http://www.uniprot.org/uniprot/>) annotated protein databases and added additional information  
222 about the possible function of the transcripts.

### 223 *Gene Ontology and Coding Sequences*

224 Gene ontology (GO) was employed to standardize gene functional classification such as  
225 molecular function, cellular component, and biological process. Using the NR database  
226 annotation, the Blast2GO program (<http://www.blast2go.com/b2ghome>) was used to retrieve GO  
227 functional classification for all transcripts (Conesa *et al.*, 2005). In order to determine the CDS  
228 for the transcripts, unigenes were first aligned to the protein databases, listed in order of priority,  
229 of NR, Swiss-Prot, KEGG, and COG by using a local blastx  
230 (<ftp://ftp.ncbi.nlm.nih.gov/blast/executables/release/LATEST/>), with significance cutoff value of  
231  $e^{-0.00001}$ , of the unigene sequences. Unigenes with alignments to higher priority databases, for  
232 example NR database, were not aligned to lower priority databases. The highest-ranking proteins  
233 in the blastx results were used to decide the coding region sequences of unigenes. Results of the  
234 blastx alignment used a standard codon table to translate the nucleotide query sequence into a  
235 translated amino acid sequence. However, unigenes that could not be aligned to any database  
236 were further scanned by ESTScan (Iseli *et al.*, 1999), producing nucleotide sequence (5'→3')  
237 direction and amino sequence of the predicted coding region.

### 238 *Gene Expression Analysis*

239 In order to determine the expression pattern of the unigenes, clean reads were first  
240 mapped to unigenes using the program Bowtie2 (v. 2.2.5 [http://bowtie-  
242 bio.sourceforge.net/bowtie2/index.shtml](http://bowtie-<br/>241 bio.sourceforge.net/bowtie2/index.shtml)) (Langmead and Salzberg, 2012). SAM files generated  
243 through Bowtie were used with the RSEM (RNA-Seq by Expectation-Maximization) software  
244 package (<http://deweylab.github.io/RSEM/>; v1.2.12) in R (v1.03; <http://www.r-project.org/>) to  
245 measure the expression level of each unigene. RSEM software was used to estimate gene  
246 expression levels from RNA-seq data (Li and Dewey, 2011), providing expression data in FPKM  
247 (Fragments Per Kilobase of transcript per Million mapped reads) format, which was  
248 subsequently used to perform differential gene expression analysis in this study. To detect  
249 Differentially Expressed Genes (DEGs) the program NOIseq  
250 (<http://genome.cshlp.org/content/early/2011/09/07/gr.124321.111>) (Tarazona *et al.*, 2011) was  
251 utilized. In this study winter and spring unigenes with a fold change of  $\geq 2$  and a probability  $\geq$   
252 0.8 were considered to be significantly differentially expressed. PCA was accomplished using  
253 Princomp function in R.

### 253 *Simple Sequence Repeats Analyses*

254 Simple Sequence Repeat (SSR) identification was accomplished with MicroSAteLLite  
255 (MISA) software (<http://pgrc.ipk-gatersleben.de/misa/misa.html>), using the unigenes as input  
256 sequences. The identified SSRs which have lengths  $\geq 150$  bp on both ends of the unigenes were  
257 used to design primers. The SSRs which met the selection criteria were used by the software  
258 Primer3 (v2.3.4; <http://www.onlinedown.net/soft/51549.htm>) to design primers. Primers derived  
259 from the unigenes were further filtered by removing primers with SSRs within the primer itself  
260 and primers aligned to more than one unigene.

### 261 *Validation of Wood-forming Genes with RT-qPCR*

262 Based on existing research information, fifteen wood-forming candidate genes  
263 correspond to the biosynthesis of cellulose, hemicellulose, or lignin (Dharmawardhana *et al.*,  
264 2010; Doering *et al.*, 2012; Jia *et al.*, 2015; Nieminen *et al.*, 2015; Pauly *et al.*, 2013; Quang *et*  
265 *al.*, 2012), were selected for validation of expression level. Using the local blast utility  
266 (<ftp://ftp.ncbi.nlm.nih.gov/blast/executables/release/LATEST/>) a database of all Paulownia  
267 unigenes was created. The mRNA sequences acquired for each of the selected genes were then

268 aligned to the database of all unigenes using the local blastx utility. The unigenes showing  
269 maximum homology for each of the genes was selected for two-step RT-qPCR primer design.  
270 The software Primer Express v3.01 (Applied Biosystems, Foster City, CA) was used to design  
271 primers for the unigenes corresponding to the selected wood forming genes. Complimentary  
272 DNA (cDNA) was synthesized from Paulownia vascular cambium total RNA using  
273 SuperScript™ II Reverse Transcriptase (Invitrogen, Waltham, Massachusetts, USA) with  
274 suggested protocol. FastStart SYBR Green Master Mix (Roche, Grenzacherstrasse, Basel,  
275 Switzerland) reagent was used in combination with primers (Table S3) and cDNA. RT-qPCR of  
276 three biological replications with no-template control (NTC) involved StepOnePlus Real-Time  
277 PCR System (Applied Biosystems, Foster City, CA, USA) and FastStart SYBR Green (Roche).  
278 The expression of selected genes was normalized to that of the 18S rRNA gene. Finally, the  
279 relative gene expression was calculated by the  $2^{-\Delta\Delta C_t}$  method (Livak and Schmittgen, 2001).

280

## 281 **Results and Discussion**

282           Empress tree (*Paulownia tomentosa*), a fast-growing tree species native to China, has  
283 been grown for the purpose of timber, pulp, soil protection, and for many other uses. Daylength  
284 affects tree growth with a short-day length introduces cessation of growth and growth rate is very  
285 high during summer. To ensure survival and productivity, perennial trees in temperate climates  
286 utilize cyclical environmental signals, such as daylength and seasonal temperature patterns. The  
287 vascular cambium, a lateral meristem found in diverse tree species, is responsible for supporting  
288 the radial, woody growth of stems. The vascular cambium consists of meristematic initials that  
289 divide over time to produce daughter cells which consequently turn into secondary xylem and  
290 secondary phloem of the stem. The daily cumulative temperature is the most important cue for  
291 cambial reactivation (Sarvas, 1970), however daylength influences cambial dormancy at the end  
292 of the summer and autumn (Heide, 1974). In forest trees, seasonal cues influence several aspects  
293 of the secondary growth of tree stems, including cambial activity, wood chemistry, and transition  
294 to latewood formation (Jokipii-Lukkari *et al.*, 2018). A recent transcriptomic study showed  
295 photoperiod as the dominant driver of seasonal gene expression variation in needles of Douglas-  
296 fir (Cronn *et al.*, 2017). Therefore, it is evident that cambial growth is affected to a greater extent  
297 by changes in the ambient temperature and affects overall seasonal growth by tuning thousands  
298 of genes reach their annual peak activity during winter dormancy. In this study, we showed how  
299 winter and spring seasons modulated the transcriptome and consequently plant growth by  
300 studying cambial transcriptome and pathway analysis.

### 301 ***RNA-Seq and Transcriptome Assembly of Paulownia Cambial Tissue***

302           In order to obtain the candidate genes associated with cambium development of empress  
303 tree during seasonal growth, transcriptome sequencing analysis for winter and spring seasons  
304 (Figure 1A and 1B) was carried out by collecting cambial tissues from tree twigs (Figure 1C). A  
305 total of 305,882,370 (~29 Gb) raw reads were generated. Removal of adapter sequences, low-  
306 quality reads, and ambiguous sequences resulted in 297,049,842 clean reads (Q20 > 97.73%)  
307 with an average length of 100 nucleotides. Winter samples generated more raw reads when  
308 compared to spring samples (Table 1).

309

310 The *de-novo* assembling of clean reads resulted in 129,428 and 104,388 total contigs for  
311 winter and spring cambial tissues, respectively. Clustering and assembly of these contigs resulted  
312 in 64,142 and 45,671 unigenes for winter and spring tissues with the average length of 960 and  
313 842 nucleotides, respectively. Among the unigenes, all unigenes were sub-classified according to  
314 nucleotide length and found that 300 nt category dominated all. The number of unigenes was  
315 reduced as the nucleotide length increased from 300 to 3,000 nt (Figure S1). A total of 40,814  
316 genes were greater than 1kb length. Approximately 58,654 unigenes were greater than 500  
317 nucleotides in length. As in most previous studies, the mean length of the contigs (~340 bp) was  
318 shorter than that of the unigenes (>1,000 bp). The paired-end reads resulted in longer unigenes  
319 (mean, ~900 bp) than those reported in previous transcriptome studies on trees (Novaes *et al.*,  
320 2008; Wang *et al.*, 2010). The mean length of unigenes (900 nucleotides) was less than those in  
321 previous studies related to tetraploid and drought (Dong *et al.*, 2014b; Xu *et al.*, 2014) species of  
322 *Paulownia australis* and *P. tomentosa*. Most of our assembled unigenes showed homology to  
323 nucleotide sequences to six public nucleotide databases. The unmatched unigenes are most likely  
324 to represent Paulownia-specific genes especially related to winter and spring seasons.

### 325 ***Functional Annotation of Paulownia Cambial Transcriptome***

326 The 61,639 transcripts were annotated by performing a BLAST search of the sequences  
327 in six databases namely Nonredundant protein (Nr) database, NCBI non-redundant nucleotide  
328 sequence (Nt) database, Swiss-Prot, Kyoto Encyclopedia of Genes and Genomes (KEGG) and  
329 Cluster of Orthologous Groups of proteins (COG). Basic Local Alignment Search Tool  
330 (BLAST), a sequence similarity search was conducted against the NCBI Nr and Nt database and  
331 Swiss-Prot protein database using E-values of less than  $10^{-5}$ . The BLAST search of 61,639  
332 unigenes showed similarity of 72.47% to Nr database followed by 69.06% with Nt, 48.97% with  
333 Swiss-Prot, 43.17% with KEGG, 29.68% with COG, 53.85% with Interpro and 44.29% with GO  
334 (Table S1).

335 Of the annotated sequences in the non-redundant (Nr) protein database, 39.3% of the  
336 mapped unigenes had very significant homology to known sequences (e-value,  $10^{-100}$ ), 35.1%  
337 showed significant homology ( $10^{-100}$ , e-value,  $10^{-30}$ ), and 25.6% showed weak homology (e-  
338 value  $10^{-30}$  to  $10^{-5}$ ) (Figure 2A). We also performed the sequence conservation analysis of

339 Paulownia transcripts with proteomes of all sequenced plant species. As depicted in Figure 2B,  
340 the E-value distribution analysis of transcripts showed that 47.0% unigenes had a similarity of  
341 more than 80%, 49.8% unigenes had a similarity between 40 and 80%, and just 3.2% unigenes  
342 had a similarity of less than 40%. We employed a new BLAST operation to study the  
343 relationship of Paulownia with other plant species to identify proteins and pathways that would  
344 be unique to Paulownia. The sequence conservation analysis of transcripts showed homology to  
345 sequences from *Erythranthe guttata* (64.8%), followed by *Vitis vinifera* (6.3%), *Solanum*  
346 *tuberosum* (5.0%), *Solanum lycopersicum* (3.0%), *Theobroma cacao* (2.7%) and others (Figure  
347 2C). *Erythranthe guttata*, a yellow bee-pollinated annual or perennial plant, is a model organism  
348 for biological studies. Paulownia transcripts shared strong homology with *Erythranthe* species  
349 and this could be due to strong phylogenetic relationship between these two species (Zhao *et al.*,  
350 2019). However, transcripts from a drought-related transcriptomic studies of Paulownia (Dong *et*  
351 *al.*, 2014b; Xu *et al.*, 2014) showed homology to *Vitis vinifera* (45-48%). This shift in homology  
352 could be due to the selection of abiotic seasonal tissue for cambial transcriptome study.

353 The analysis of 43,780 transcripts in COG database classified them into 25 protein  
354 families participated in transcription, replication and recombination, posttranslational  
355 modification, signal transduction, and so on. However, the cluster for general function prediction  
356 (7,998) represented the largest group, followed by transcription (4,017), replication,  
357 recombination and repair (3,451), posttranslational modification, protein turnover and  
358 chaperones (3,414), signal transduction mechanisms (3,158), translation, ribosomal structure and  
359 biogenesis (3,055), carbohydrate transport and metabolism (2,776), amino acid transport and  
360 metabolism (1,874), cell wall/membrane/envelope biogenesis (1,629), energy production and  
361 conversion (1,563), cell cycle control, cell division, and chromosome partitioning (1,356). In  
362 contrast, only a few unigenes were assigned to extracellular structure and nuclear structure (17  
363 and 4 unigenes, respectively). Importantly, many unigenes have been assigned to a wide range of  
364 COG classifications (Figure 3), indicating that a wide diversity of transcripts involved in wood  
365 formation as in Chinese fir (Qiu *et al.*, 2018).

366 The Gene Ontology (GO) classification classified 42,588 out of 62,639 transcripts into  
367 ontologies related to molecular functions, cellular components and biological processes, allowing  
368 a coherent annotation of transcripts (Figure 4). We identified significantly higher number of

369 transcripts (19,418) involved in metabolic process and 18,047 related to cellular processes  
370 (18,047) when compared to others such as rhythmic processes (number). The most represented  
371 category for cellular components was cells (GO: 0005623; 18186 genes) followed by organelle  
372 (GO:0043226; 14053 genes). But for molecular functions, the catalytic activity (GO: 0003824;  
373 17403 genes) was the most represented GO term followed by the binding activity (GO: 0005488;  
374 15485 genes). Genes and pathways putatively responsible for dormant winter and active spring  
375 growth in Paulownia were identified in this study. In *Populus*, *PtrHB7*, a class III HD-Zip gene,  
376 is known to play a critical role in regulation of vascular cambium differentiation (Zhu *et al.*,  
377 2013) and homeobox gene *ARBORKNOX1* regulates the shoot apical meristem and the vascular  
378 cambium (Groover *et al.*, 2006). In our study, Unigene2201, Unigene3374, and Unigene4121  
379 which were downregulated belong to GO:0005488 (molecular function: binding) and are  
380 homologs of *KNOX* gene. *KNOX* family gene *KNAT7* negatively regulates secondary wall  
381 formation in *Arabidopsis* and *Populus* (Li *et al.*, 2012). Since *KNAT7* is a negative regulator of  
382 secondary wall biosynthesis, these Paulownia homologs might positively regulate cambium  
383 growth during active spring season.

384 In order to categorize the different biochemical pathways that the annotated unigenes  
385 were associated with, we assigned the EC numbers in the KEGG pathways. KEGG annotation  
386 yielded a total of 35,471 (57.5%) unigenes that were mapped to 128 KEGG pathways. The top  
387 eight KEGG enriched pathways were metabolic pathways 7943 (22.39%; ko01100) biosynthesis  
388 of secondary metabolites 3768 (10.62%; ko01110), and plant-pathogen interaction 1852 (5.22%;  
389 ko04626), plant hormone signal transduction 1717 (4.84%; ko04075), spliceosome 1462 (4.12%;  
390 ko03040), ribosome 1179 (3.32%; ko03010), RNA transport 1165 (3.28%; ko03013) and protein  
391 processing in endoplasmic reticulum 1120 (3.16%; ko04141) (Table S2). With the help of  
392 KEGG database, we could further analyze the metabolic pathways and functions of gene  
393 products, which help in studying the complex biological behaviors of genes. Most representative  
394 unigenes were annotated to metabolic pathways, biosynthesis of secondary metabolites, plant-  
395 pathogen interaction, plant hormone signaling, spliceosome, and phenylpropanoid biosynthesis  
396 using the KEGG database, lead us conclude that most of the genes identified in this study are  
397 involved in cambial differentiation and wood formation.

398 ***Transcriptional Profiling of Cambial Tissues in Winter and Spring***



399 A total of 10,099 (12.33%) transcripts were found to be significantly differentially  
400 expressed between two tissue samples. Of these differentially expressed genes (DEGs), 2,688  
401 (26.61%) transcripts were found to be upregulated (>1.6 fold) in spring season, whereas 7,411  
402 (73.39%) were downregulated (<-1.6 fold) when compared to winter season (Figure S2).  
403 Hierarchical clustering of the DEGs identified in winter and spring conditions led to the detailed  
404 overall structure of clustering. This indirectly indicated that more genes were upregulated, active  
405 and required during the senescent winter season to keep tissues dormant. Out of 2,688 genes, top  
406 20 genes with log<sub>2</sub>Fold change >8.00 are summarized in Table 2. This included APC/C  
407 cyclosome complex, phosphoenolpyruvate carboxy kinase, different classes of heat shock  
408 proteins, actin depolymerization factor, anaphase-promoting complex subunit (>12-fold  
409 expression), etc. Similarly, many key genes including synthases such as galactinol synthase (<-  
410 12-fold expression), rosmarinate synthase, and valencene synthase, kinases such as receptor-like  
411 protein kinase, serine/threonine protein kinase, and CBL-interacting protein kinase, and hormone  
412 regulated genes such as auxin efflux carrier family protein and ethylene-responsive transcription  
413 factor were downregulated (Table 3). The cell cycle, being one of the most important biological  
414 processes in the cambial zone, plays central role in regulating the growth and development of  
415 organisms including plants. The anaphase-promoting complex/cyclosome (APC/C; homolog in  
416 our study Unigene8688), a well-known ubiquitin ligase, acts to accomplish basic cell-cycle  
417 control. The APC/C must be turned off at the end of G1 phase to allow the S phase cyclins to  
418 accumulate and cells to begin DNA replication (Pines, 2011). This is very key during spring  
419 season for cell multiplication and growth. The *Cyclin U2* (Unigene22553), one of the major  
420 cyclins involved in cell cycle control, like cyclins A and B on maximum gene expression in  
421 poplar cambium zone (Hertzberg *et al.*, 2001) was upregulated in Paulownia. The high  
422 abundance of cyclin transcripts in active cambium during spring season also reflected a positive  
423 correlation between cambium cell division and key cell cycle gene expression.

424 As shown in Figure 5, GO analysis indicated that most of the DEGs for biological  
425 process were involved in the metabolic process (1,016), cellular process (890), and response to  
426 stimulus (350). GO cellular component analysis revealed the cell (824), cell part (789),  
427 membrane (436) and organelle (399) enriched the most DEGs. Meanwhile, GO molecular  
428 function analysis showed that the DEGs predominantly contributed to catalytic activity (836)  
429 followed by transporter activity and structural molecule activity. KEGG enrichment analysis of

430 DEG showed that these genes were involved in various pathways in Paulownia plant during  
431 seasonal changes (Table 4). Most of the DEGs were enriched in metabolic pathways (ko01100;  
432 1387), biosynthesis of secondary metabolites (ko01110; 827), and plant hormone signal  
433 transduction (ko04075; 320). It was also found that starch and sucrose metabolism (ko00500;  
434 172; Figure S3) and phenylpropanoid biosynthesis (ko00940; 106; Figure S4), which correspond  
435 to the production of several key wood forming genes, were within the top 25 most DEG enriched  
436 KEGG pathways (Table 4). Nineteen (Unigene11539, Unigene12164, Unigene12788,  
437 Unigene16018, Unigene17615, Unigene18048, Unigene18594, Unigene18926, Unigene22808,  
438 Unigene24462, Unigene24837, Unigene3634, Unigene4753, Unigene6221, Unigene891, and  
439 Unigene9670 (K00430), Unigene16856 (K11188), Unigene22599 and Unigene25305 (K03782))  
440 out of 497 unigenes (total unigenes) involved in lignin synthesis in the phenylpropanoid  
441 biosynthesis pathway (Ko00940) were identified and differentially regulated (Figure S4). Lignin  
442 plays a vital role in keeping the structural integrity of the cell wall, and protecting plants from  
443 pathogens (Hu *et al.*, 2008) as well as a main component of wood. Of these 19, different types of  
444 peroxidases (Unigene11539, Unigene18926, Unigene4753 and Unigene6221) were upregulated  
445 during winter. Recently, a notable remodeling of the transcriptome was reported in Norway  
446 Spruce where monolignol biosynthesis genes showed high expression during the period of  
447 secondary cell wall formation as well as a second peak in midwinter. Interestingly, this  
448 midwinter peak expression did not trigger lignin deposition. (Jokipii-Lukkari *et al.*, 2018). These  
449 genes could be preparing for the biosynthesis and distribution of guaiacyl (G), p-hydroxyl phenol  
450 (H) and syringyl (S) lignin in developing biomass as soon as the onset of Spring.

451 Out of 61,639 annotated unigenes, 58,324 unigenes were matched to known genes using  
452 blastx and 1,708 unigenes were matched to coding sequences using ESTscan. Most unigenes  
453 population were ranked from 200-3000 nucleotides in length (Figure S7). Most of the unigenes  
454 (34,000) were about 200 nt in length for coding sequences. There were no translated peptides  
455 beyond 2,500 sequences. In case of ESTScan method, most of the unigenes from 200-3000 nt in  
456 length were translated into protein sequences in the range of 200 to 1,100. This difference could  
457 be due to extra sequences in the full-length cDNAs than protein coding sequences.

#### 458 ***Expression of Lignocellulosic Pathway Genes and Their Validation***

459 Wood, the secondary xylem, is produced from the activity of vascular cambium that is  
460 composed of two meristematic initials: fusiform initials and ray initials (Mauseth, 1988) with the  
461 sequential developmental process including differentiation of vascular cambium cells into  
462 secondary xylem mother cells, cell expansion, and massive deposition of secondary walls where  
463 a number of genes involved in vascular tissue differentiation and secondary wall biosynthesis  
464 (Zhong and Ye, 2015). When the wood compression starts, the expression of a number of genes  
465 involved in synthesis of lignocellulosic components (cellulose, hemicellulose and lignin) and  
466 lignans was upregulated in maritime pine (Villalobos *et al.*, 2012). In addition onset of wood  
467 formation undergoes three periods: winter shrinkage, spring rehydration (32-47 days) and  
468 summer transpiration in the stem (Turcotte *et al.*, 2009).

469 In order to explore the roles of cell wall- and hormone related genes for the seasonal  
470 cues, fifteen candidate genes were identified from previous studies (Table 5). They are involved  
471 in cellulose (*CesA1*, *CesA3*, *CesA6* (Djerbi *et al.*, 2004)), hemicellulose (*CSLC4* (Davis *et al.*,  
472 2010), *FUT1* (Perrin *et al.*, 1999; Vanzin *et al.*, 2002), *AXY4* (Gille *et al.*, 2011), *GATL1* (Kong  
473 *et al.*, 2009), *IRX10* (Hörnblad *et al.*, 2013), *ESKIMO1* (Lefebvre *et al.*, 2011)), lignin (*4CL* (Hu  
474 *et al.*, 1999), *CCR1* (Goujon *et al.*, 2003), *CAD1* (Bouvier d'Yvoire *et al.*, 2013)), auxin (*TAA1*  
475 (Stepanova *et al.*, 2008), *YUC1* (Cheng *et al.*, 2006; Won *et al.*, 2011)) and cytokinin (*IPT1*  
476 (Immanen *et al.*, 2016)) synthesis/pathways. RT-qPCR was employed to study the expression of  
477 these wood formation genes in Paulownia during winter and spring seasons (Figure 6).

478 Cellulose is synthesized in plant cell walls by large membrane-bound protein complexes  
479 proposed to contain several copies of the catalytic subunit of the cellulose synthase, *CesA*. Here,  
480 we found *CesA1* and *CesA6* were upregulated during spring while *CesA3* was moderately  
481 downregulated during winter season. In hybrid aspen, expression analyses of *CesA* family  
482 showed specific location in normal wood undergoing xylogenesis, while *PttCesA2*, seems to be  
483 activated on the opposite side of a tension wood (Djerbi *et al.*, 2004). However, in Arabidopsis,  
484 the expression levels of the three primary cell wall genes (*AtCesA2*, *AtCesA5*, *AtCesA6*) was  
485 increased, but not *AtCesA3*, *AtCesA9* or secondary cell wall *AtCesA7* (Hu *et al.*, 2018). Our  
486 results along with these studies indicated that the expression of major primary wall *CesA* genes  
487 to accelerate primary wall *CesA* complex.

488 Several proteins encoded by the cellulose synthase-like (*CSL*) gene family including  
489 CSLA proteins, which synthesize  $\beta$ (1 $\rightarrow$ 4)-linked mannans, and CSLC proteins, which are  
490 thought to synthesize the  $\beta$ (1 $\rightarrow$ 4)-linked glucan backbone of xyloglucan are known to be  
491 involved in the synthesis of cell wall polysaccharides (Davis *et al.*, 2010). Higher expression of  
492 CLSC4 in Paulownia during spring season indicated that it might involve cellulose synthesis.  
493 The fucosyltransferase (FUT1) is an enzyme that transfers an L-fucose sugar from a GDP-fucose  
494 (guanosine diphosphate-fucose) donor substrate to an acceptor substrate. The Arabidopsis *mur1*  
495 (AtFUT1) mutant study (Vanzin *et al.*, 2002) exhibited a dwarf growth habit and decreased wall  
496 strength indicating indispensable role of FUT1 function in wood formation. Another key gene  
497 family of O-acetyl substituents seems to be very important for various plant tissues and during  
498 plant development (Liners *et al.*, 1994), suggesting an important functional role in the plant.  
499 Mutants lacking *AXY4* transcript resulted in a complete lack of O-acetyl substituents on  
500 xyloglucan in several tissues, except seeds (Gille *et al.*, 2011). Biosynthesis of xylan in woody  
501 plants is a major pathway for plant biomass. Populus genes *PdGATL1.1* and *PdGATL1.2*, the  
502 closest orthologs to the Arabidopsis *PARVUS/GATL1* gene, have been shown to be important for  
503 xylan synthesis, but may also have role(s) in the synthesis of other wall polymers (Kong *et al.*,  
504 2009). The expression of *GATL1* homolog in Paulownia was six-fold (Figure 6) in spring season  
505 implying more xylan biosynthesis. Collapsed xylem phenotypes of Arabidopsis (Turner and  
506 Somerville, 1997) and *Physcomitrella patens* (Hörnblad *et al.*, 2013) mutants (*irx10*) identified  
507 mutants deficient in cellulose deposition in the secondary cell wall due to lack of synthesis of the  
508 glucuronoxylan. Acetyl transferases are involved cellulose biosynthesis in plants. In Arabidopsis,  
509 the *ESKIMO1 (ESKI)* gene has been described for multiple roles and mutants of which (*esk1*)  
510 indicated that *ESKI* is necessary for the synthesis of functional xylem vessels towards laying  
511 down of secondary cell wall components (Lefebvre *et al.*, 2011). Our gene expression along with  
512 RNAseq of cellulose and hemicellulose indicated that all these genes were highly expressed  
513 during spring season to prop complete wood formation.

514

515 Trees have extreme needs for both structural support and water transport and 15 to 36%  
516 of the dry weight of wood is lignin (Sarkanen and Hergeht, 1971). Since lignin limits the use of  
517 wood for fiber, chemical, and energy production, lignin is therefore one of the world's most

518 abundant natural polymers, along with cellulose and chitin. It has been shown that *PAL* or *4CL*  
519 (*4-coumarate:coenzyme A ligase*) was strongly downregulated indicating lower lignin content  
520 with a preferred reduced content in G units and increase cellulose in aspen (Hu *et al.*, 1999).  
521 However, we found upregulation of *4CL* in Paulownia (Figure 6). It is reported that Paulownia  
522 spp. and hybrids showed more Klason lignin 22.9–27.8% whereas aspen exhibited 19.3%  
523 (García *et al.*, 2011) relating positive correlation with increased *4CL* transcripts in Paulownia  
524 from RT-qPCR results. Cinnamoyl CoA reductase (*CCR*) is the first enzyme in monolignols  
525 synthesis. Arabidopsis (*atccr1*) mutants were severely downregulated and had 50% decrease in  
526 lignin content accompanied by changes in lignin composition and structure implying *CCR1* was  
527 a positive regulator (Goujon *et al.*, 2003). However, it showed downregulation in Paulownia  
528 during spring season. Disrupting the *Brachypodium Cinnamyl Alcohol Dehydrogenase 1* gene  
529 (*BdCAD1*) leads to altered lignification and improved saccharification (Bouvier d'Yvoire *et al.*,  
530 2013). Another study in poplar tree suggested that downregulating *CAD1* is a promising strategy  
531 for improving lignocellulosic biomass (Van Acker *et al.*, 2017). Lignin is the major phenolic  
532 polymer in plant secondary cell walls and is polymerized from monomeric subunits, the  
533 monolignols (Yan *et al.*, 2019). The BiFC biochemical assay showed molecular interaction of  
534 *PtrCAD1/PtrCCR2* homo- and heterodimer formation. The downregulation of *CCR1* and *CAD1*  
535 in Paulownia indicates the improvement of lignocellulosic biomass. Altogether, the  
536 lignocellulosic pathway genes regulate the components of cellulose, hemicellulose and lignin in  
537 appropriate ratios as indicated earlier repression of lignin biosynthesis promotes cellulose  
538 accumulation and growth in aspen tree (Hu *et al.*, 1999).

### 539 ***Analysis of Hormone-Specific Genes and Their Validation***

540 Auxins, morphogen-like plant-growth regulators, with some play a key role in regulating  
541 wood formation through its effects on cambial activity and xylem development (Sundberg *et al.*,  
542 2000). It is required for maintaining the cambium in a meristematic state as depleting the  
543 cambium of auxin leads to differentiation of cambial cells to axial parenchyma cells (Savidge,  
544 1983). Cytokinins, on the other hand, have a well-established function in cell division during  
545 growth and development and they are called central regulators of cambial activity (Matsumoto-  
546 Kitano *et al.*, 2008). The interaction between auxin and cytokinin seems to be essential for  
547 induction of phenylalanine ammonialyase activity in support of lignification (Bevan and

548 Northcote, 1979). *TAA1*, which performs first two reactions in auxin pathway, is a Trp  
549 aminotransferase that converts Trp to IPA in the IPA auxin biosynthesis branch in Arabidopsis  
550 (Won *et al.*, 2011). Higher order mutants in *TAA1* showed auxin-related multiple phenotypes.  
551 Later, it was identified that *TAA1* gene was essential for hormone crosstalk with ethylene for  
552 plant development (Stepanova *et al.*, 2008). Later, new putative function of IAA production via  
553 IPyA and transport was identified which was newly postulated (Stepanova *et al.*, 2011).

554 Another group of auxin biosynthesis gene family, *YUCCA* flavin monooxygenases,  
555 controls the formation of floral organs and vascular tissues in Arabidopsis (Cheng *et al.*, 2006).  
556 When *TAA* family of amino transferases converts tryptophan to indole-3-pyruvate (IPA) and that  
557 the *YUCCA* (*YUC*) family participates in converting IPA to IAA, the main auxin in plants (Won  
558 *et al.*, 2011). In addition, the authors found that *YUC* and *TAA* work genetically in the same  
559 pathway and that *YUC* is downstream of *TAA*. From our transcriptome and gene expression  
560 studies, we observed *TAA1* was strongly expressed with no obvious difference in *YUC1*  
561 expression during spring season. Different unigenes involved in auxin biosynthesis are given in  
562 tryptophan pathway for cell enlargement and plant growth (Figure S5).

563 In Arabidopsis, cambial activity responded to small changes in cytokinin levels indicating  
564 that cytokinins are central regulators of cambium activity (Matsumoto-Kitano *et al.*, 2008).  
565 Isopentenyltransferase, the rate limiting step of cytokinin biosynthesis, is an important enzyme  
566 playing key roles in meristem maintenance and organ development. Arabidopsis quadruple  
567 mutants lacking *AtIPT1*, *AtIPT3*, *AtIPT5*, and *AtIPT7* were unable to form cambium and showed  
568 reduced thickening of the root and stem, though single mutant *atipt3* showing moderately  
569 decreased levels of cytokinins without any other recognizable morphological changes. Similarly,  
570 increased cytokinin biosynthesis stimulates the cambial cell division rate and increases the  
571 production of trunk biomass in transgenic Populus trees (Immanen *et al.*, 2016). Surprisingly,  
572 *IPT1* expression was high in winter and moderately reduced in spring indicating two  
573 possibilities. Cytokinin pathway with *IPT1* role might have been active during mid-winter (end  
574 of March). Alternatively, there could be many other members in *IPT* family that complement the  
575 function of cambial development. Auxin and cytokinin display distinct distribution profiles  
576 across the cambium and elevated cytokinin content leads to an increased cambial auxin  
577 concentration (Immanen *et al.*, 2016). Together, it is very interesting to see the interaction of



578 lignocellulosic pathways genes along with major hormone-regulated genes and their crosstalks to  
579 maintain the balance of cambial activities for quality wood formation with alternative seasonal  
580 changes (Figure S6).

### 581 *Analysis of Simple Sequence Repeats (SSRs)*

582 SSR markers are very useful for multiple applications in plant genetics because of their  
583 co-dominance, high level of polymorphism, multi-allelic variance, and abundance, and cross-  
584 species transferability (Barbara *et al.*, 2007; Powell *et al.*, 1996). In the present study, SSR were  
585 identified utilizing the transcriptome of paulownia cambial tissues because EST-SSR markers  
586 have a relatively higher transferability than genomic SSRs (Varshney *et al.*, 2005). Recent  
587 studies showed that abundant EST-SSRs from RNA-seq have agronomic potential and constitute  
588 a scientific basis for future studies on the identification, classification, molecular verification and  
589 innovation of germplasms in hawthorn and Lei bamboo (Cai *et al.*, 2019; Ma *et al.*, 2019).

590 We identified 11,338 SSRs from the annotated 61,639 unigenes. We detected 3,036  
591 mononucleotides, 5,492 dinucleotides, 2,493 trinucleotides, 204 tetranucleotides, 194  
592 pentanucleotides, and 344 hexanucleotides motifs (Figure 7; Table S4). Among the dinucleotide  
593 and trinucleotide SSRs, AG/CT repeats represented 2,997 SSRs, and AAG/CTT repeats  
594 represented 582 SSRs. In mononucleotide, dinucleotide, trinucleotide, quadnucleotide,  
595 pentanucleotide, and hexanucleotide repeat categories, the occurrences of repeats were twelve,  
596 six, five, five, four and four, respectively (Table S4). Finally, 6,773 oligonucleotide pairs were  
597 generated for these identified SSR markers (Table S5). SSRs and SNPs are the most useful and  
598 robust molecular markers for genetics and plant breeding applications (Hiremath *et al.*, 2012).  
599 This study provided a set of SSR markers that could be used, for example, in diversity analysis  
600 of Paulownia species. In addition, Paulownia tree breeding programs will benefit from the  
601 availability of these SSR markers identified from our RNAseq data. Mononucleotide SSRs  
602 would be excluded because of the frequent homopolymer errors found in sequencing data and  
603 less polymorphism, dinucleotides (46.6%) and trinucleotides (21.2%) contributed most in  
604 Paulownia. This is consistent with the EST-SSRs distributions reported in other plant species  
605 (Ahn *et al.*, 2013; Wang *et al.*, 2014). In plants, SNPs are predominantly beneficial in the  
606 construction of high-resolution genetic maps, positional cloning, marker assisted selection



607 (MAS) of important genes, genome wide linkage disequilibrium associate analysis, and species  
608 origin, relationship and evolutionary studies (Shahinnia and Sayed-Tabatabaei, 2009).

## 609 **Conclusion**

610 Paulownia is a fast growing, multipurpose timber tree suitable for use as a dedicated  
611 lignocellulosic bioenergy crop. In order to understand the genes involved in formation of woody  
612 biomass related to seasonal cues, a *de novo* transcriptome study was conducted on vascular  
613 cambium tissue from senescent winter vascular cambium tissue and actively growing spring  
614 vascular cambium tissue. To the best of our knowledge, this is the first transcriptome-based  
615 study on *P. elongata*, as well as the first transcriptome study performed on Paulownia vascular  
616 cambium tissue focusing seasonal difference. A set of transcripts was specifically expressed in  
617 two different tissues. The transcript abundance data confirms the differential pattern of  
618 expression of cellulosic, hemicellulosic, lignin biosynthesis specific, and hormone pathway  
619 specific genes. By analyzing the transcriptome from two different temporal treatments (winter  
620 and spring), representing two distinct physiological states of the plant, DEGs were identified  
621 from both treatments. Cell division is one of the key process taking place in the cambial zone and  
622 majority of the cell cycle genes were upregulated during the active stage. Onset of cambial  
623 activity began between the end of March and the beginning of April as the increased  
624 vacuolization of meristematic cells and the mitotic activity occur. However, our study showed  
625 more genes were downregulated in spring season remain to be answered. Overall, results of this  
626 study will be useful for future research regarding wood formation in Paulownia and other trees.

627

628

629

630

631

632

633

634

635 **References**

- 636 **Ahn Y-K, Tripathi S, Cho Y-I, Kim J-H, Lee H-E, Kim D-S, Woo J-G, Cho M-C.** 2013. De  
637 novo transcriptome assembly and novel microsatellite marker information in *Capsicum annuum*  
638 varieties Saengryeg 211 and Saengryeg 213. *Botanical studies* **54**, 1-10.
- 639 **Akyildiz MH, Kol Sahin H.** 2010. Some technological properties and uses of paulownia  
640 (*Paulownia tomentosa* Steud.) wood. *Journal of Environmental Biology* **31**, 351-355.
- 641 **Aspeborg H, Schrader J, Coutinho PM, Stam M, Kallas Å, Djerbi S, Nilsson P, Denman S,**  
642 **Amini B, Sterky F.** 2005. Carbohydrate-active enzymes involved in the secondary cell wall  
643 biogenesis in hybrid aspen. *J Plant Physiology* **137**, 983-997.
- 644 **Barbara T, PALMA-SILVA C, Paggi GM, Bered F, Fay MF, Lexer C.** 2007. Cross  
645 species transfer of nuclear microsatellite markers: potential and limitations. *Molecular Ecology*  
646 **16**, 3759-3767.
- 647 **Bevan M, Northcote D.** 1979. The interaction of auxin and cytokinin in the induction of  
648 phenylalanine ammonia-lyase in suspension cultures of *Phaseolus vulgaris*. *Planta* **147**, 77-81.
- 649 **Bouvier d'Yvoire M, Bouchabke-Coussa O, Voorend W, Antelme S, Cézard L, Legée F,**  
650 **Lebris P, Legay S, Whitehead C, McQueen-Mason SJ.** 2013. Disrupting the **cinnamyl**  
651 **alcohol dehydrogenase 1** gene (*Bd CAD 1*) leads to altered lignification and improved  
652 saccharification in *Brachypodium distachyon*. *The Plant Journal* **73**, 496-508.
- 653 **Cai K, Zhu L, Zhang K, Li L, Zhao Z, Zeng W, Lin X.** 2019. Development and  
654 characterization of EST-SSR markers from RNA-Seq data in *Phyllostachys violascens*. *Frontiers*  
655 *in plant science* **10**, 50.
- 656 **Cao X, Zhai X, Zhang Y, Cheng Z, Li X, Fan G.** 2018a. Comparative analysis of microRNA  
657 expression in three *Paulownia* species with *Phytoplasma* infection. *Forests* **9**, 302.
- 658 **Cao Y, Fan G, Zhai X, Dong Y.** 2018b. Genome-wide analysis of lncRNAs in *Paulownia*  
659 *tomentosa* infected with *phytoplasmas*. *Acta physiologiae plantarum* **40**, 49.
- 660 **Cheng Y, Dai X, Zhao Y.** 2006. Auxin biosynthesis by the YUCCA flavin monooxygenases  
661 controls the formation of floral organs and vascular tissues in *Arabidopsis*. *Genes &*  
662 *development* **20**, 1790-1799.
- 663 **Clatterbuck KW, Hodges DG.** 2004. Tree Crops for Marginal Farmland. Paulownia. *The*  
664 *University of Tennessee Extension*, Vol. PB 1465. University of Tennessee, USA 1-32.
- 665 **Conesa A, Götz S, García-Gómez JM, Terol J, Talón M, Robles M.** 2005. Blast2GO: a  
666 universal tool for annotation, visualization and analysis in functional genomics research.  
667 *Bioinformatics* **21**, 3674-3676.

- 668 **Cronn R, Dolan PC, Jogdeo S, Wegrzyn JL, Neale DB, Clair JBS, Denver DR.** 2017.  
669 Transcription through the eye of a needle: daily and annual cyclic gene expression variation in  
670 Douglas-fir needles. *BMC Genomics* **18**, 558.
- 671 **Davis J, Brandizzi F, Liepman AH, Keegstra K.** 2010. Arabidopsis mannan synthase CSLA9  
672 and glucan synthase CSLC4 have opposite orientations in the Golgi membrane. *The Plant*  
673 *Journal* **64**, 1028-1037.
- 674 **Dharmawardhana P, Brunner AM, Strauss SH.** 2010. Genome-wide transcriptome analysis  
675 of the transition from primary to secondary stem development in *Populus trichocarpa*. *J BMC*  
676 *Genomics* **11**, 150.
- 677 **Djerbi S, Aspeborg H, Nilsson P, Sundberg B, Mellerowicz E, Blomqvist K, Teeri TT.** 2004.  
678 Identification and expression analysis of genes encoding putative cellulose synthases (CesA) in  
679 the hybrid aspen, *Populus tremula* (L.) $\times$  *P. tremuloides* (Michx.). *Cellulose* **11**, 301-312.
- 680 **Doering A, Lathe R, Persson S.** 2012. An update on xylan synthesis. *J Molecular plant* **5**, 769-  
681 771.
- 682 **Dong Y, Fan G, Zhao Z, Deng M.** 2014a. Compatible solute, transporter protein, transcription  
683 factor, and hormone-related gene expression provides an indicator of drought stress in  
684 *Paulownia fortunei*. *Funct Integr Genomics* **14**, 479-491.
- 685 **Dong Y, Fan G, Zhao Z, Deng M.** 2014b. Transcriptome expression profiling in response to  
686 drought stress in *Paulownia australis*. *Int J Mol Sci* **15**, 4583-4607.
- 687 **Espinosa Ruiz A, Saxena S, Schmidt J, Mellerowicz E, Miskolczi P, Bakó L, Bhalerao RP.**  
688 2004. Differential stage-specific regulation of cyclin-dependent kinases during cambial  
689 dormancy in hybrid aspen. *The Plant Journal* **38**, 603-615.
- 690 **Fan G, Cao Y, Wang Z.** 2018. Regulation of long noncoding RNAs responsive to *Phytoplasma*  
691 infection in *Paulownia tomentosa*. *International Journal of Genomics* **2018**, 16.
- 692 **Fan G, Dong Y, Deng M, Zhao Z, Niu S, Xu E.** 2014. Plant-pathogen interaction, circadian  
693 rhythm, and hormone-related gene expression provide indicators of phytoplasma infection in  
694 *Paulownia fortunei*. *Int J Mol Sci* **15**, 23141-23162.
- 695 **Fan G, Wang L, Deng M, Niu S, Zhao Z, Xu E, Cao X, Zhang X, Genomics.** 2015.  
696 Transcriptome analysis of the variations between autotetraploid *Paulownia tomentosa* and its  
697 diploid using high-throughput sequencing. *J Molecular Genetics* **290**, 1627-1638.
- 698 **García JC, Zamudio MA, Pérez A, Feria MJ, Gomide JL, Colodette JL, López F.** 2011.  
699 Soda-AQ pulping of Paulownia wood after hydrolysis treatment. *BioResources* **6**, 971-986.
- 700 **Gille S, de Souza A, Xiong G, Benz M, Cheng K, Schultink A, Reca I-B, Pauly M.** 2011. *O*-  
701 acetylation of Arabidopsis hemicellulose xyloglucan requires AXY4 or AXY4L, proteins with a  
702 TBL and DUF231 domain. *The Plant Cell* **23**, 4041-4053.

- 703 **Goujon T, Ferret V, Mila I, Pollet B, Ruel K, Burlat V, Joseleau J-P, Barriere Y, Lapierre**  
704 **C, Jouanin L.** 2003. Down-regulation of the *AtCCR1* gene in *Arabidopsis thaliana*: effects on  
705 phenotype, lignins and cell wall degradability. *Planta* **217**, 218-228.
- 706 **Grabherr MG, Haas BJ, Yassour M, Levin JZ, Thompson DA, Amit I, Adiconis X, Fan L,**  
707 **Raychowdhury R, Zeng Q, Chen Z, Mauceli E, Hacohen N, Gnirke A, Rhind N, di Palma**  
708 **F, Birren BW, Nusbaum C, Lindblad-Toh K, Friedman N, Regev A.** 2011. Full-length  
709 transcriptome assembly from RNA-Seq data without a reference genome. *Nature biotechnology*  
710 **29**, 644-652.
- 711 **Groover AT, Mansfield SD, DiFazio SP, Dupper G, Fontana JR, Millar R, Wang Y.** 2006.  
712 The *Populus* homeobox gene *ARBORKNOX1* reveals overlapping mechanisms regulating the  
713 shoot apical meristem and the vascular cambium. *Plant molecular biology* **61**, 917-932.
- 714 **Heide OM.** 1974. Growth and dormancy in Norway spruce ecotypes (*Picea abies*) I. Interaction  
715 of photoperiod and temperature. *Physiologia Plantarum* **30**, 1-12.
- 716 **Hertzberg M, Aspeborg H, Schrader J, Andersson A, Erlandsson R, Blomqvist K, Bhalerao**  
717 **R, Uhlén M, Teeri TT, Lundeberg J.** 2001. A transcriptional roadmap to wood formation. *J*  
718 *Proceedings of the National Academy of Sciences* **98**, 14732-14737.
- 719 **Hiremath PJ, Kumar A, Penmetsa RV, Farmer A, Schlueter JA, Chamarthi SK, Whaley**  
720 **AM, Carrasquilla Garcia N, Gaur PM, Upadhyaya HD.** 2012. Large-scale development of  
721 cost-effective SNP marker assays for diversity assessment and genetic mapping in chickpea and  
722 comparative mapping in legumes. *Plant biotechnology journal* **10**, 716-732.
- 723 **Hörnblad E, Ulfstedt M, Ronne H, Marchant A.** 2013. Partial functional conservation of  
724 IRX10 homologs in *Physcomitrella patens* and *Arabidopsis thaliana* indicates an evolutionary  
725 step contributing to vascular formation in land plants. *BMC plant biology* **13**, 3.
- 726 **Hu H, Zhang R, Feng S, Wang Y, Wang Y, Fan C, Li Y, Liu Z, Schneider R, Xia T.** 2018.  
727 Three *AtCesA6*-like members enhance biomass production by distinctively promoting cell  
728 growth in *Arabidopsis*. *Plant biotechnology journal* **16**, 976-988.
- 729 **Hu W-J, Harding SA, Lung J, Popko JL, Ralph J, Stokke DD, Tsai C-J, Chiang VL.** 1999.  
730 Repression of lignin biosynthesis promotes cellulose accumulation and growth in transgenic  
731 trees. *Nature biotechnology* **17**, 808-812.
- 732 **Hu Z, Liu Q, Tan M, Yi H, Deng X.** 2008. Lignin deposition converts juice sacs to “Brown  
733 Thorns” in a citrus triploid hybrid. *Journal of the American Society for Horticultural Science*  
734 **133**, 173-177.
- 735 **Immanen J, Nieminen K, Smolander O-P, Kojima M, Serra JA, Koskinen P, Zhang J, Elo**  
736 **A, Mähönen AP, Street N.** 2016. Cytokinin and auxin display distinct but interconnected  
737 distribution and signaling profiles to stimulate cambial activity. *Current Biology* **26**, 1990-1997.
- 738 **Iseli C, Jongeneel CV, Bucher P.** 1999. ESTScan: a program for detecting, evaluating, and  
739 reconstructing potential coding regions in EST sequences. *ISMB*, Vol. 99, 138-148.

- 740 **Jia X-L, Wang G-L, Xiong F, Yu X-R, Xu Z-S, Wang F, Xiong A-S.** 2015. *De novo*  
741 assembly, transcriptome characterization, lignin accumulation, and anatomic characteristics:  
742 novel insights into lignin biosynthesis during celery leaf development. *J Scientific reports* **5**,  
743 8259.
- 744 **Jokipii-Lukkari S, Delhomme N, Schiffthaler B, Mannapperuma C, Prestele J, Nilsson O,**  
745 **Street NR, Tuominen H.** 2018. Transcriptional roadmap to seasonal variation in wood  
746 formation of Norway spruce. *Plant Physiology* **176**, 2851-2870.
- 747 **Joshee N.** 2012. Paulownia: A Multipurpose Tree for Rapid Lignocellulosic Biomass  
748 Production. In: Kole C, Joshi, C.P., Shonnard, D. , ed. *Handbook of Bioenergy crop Plants*. Boca  
749 Raton, USA: Taylor & Francis, 671-686.
- 750 **Kanehisa M, Araki M, Goto S, Hattori M, Hirakawa M, Itoh M, Katayama T, Kawashima**  
751 **S, Okuda S, Tokimatsu T.** 2007. KEGG for linking genomes to life and the environment.  
752 *Nucleic acids research* **36**, D480-D484.
- 753 **Ko J-h, Han K-h.** 2004. Arabidopsis whole-transcriptome profiling defines the features of  
754 coordinated regulations that occur during secondary growth. *J Plant molecular biology* **55**, 433-  
755 453.
- 756 **Kong Y, Zhou G, Avci U, Gu X, Jones C, Yin Y, Xu Y, Hahn MG.** 2009. Two poplar  
757 glycosyltransferase genes, *PdGATL1. 1* and *PdGATL1. 2*, are functional orthologs to  
758 *PARVUS/AtGATL1* in *Arabidopsis*. *Molecular Plant* **2**, 1040-1050.
- 759 **Langmead B, Salzberg SL.** 2012. Fast gapped-read alignment with Bowtie 2. *J Nature methods*  
760 **9**, 357.
- 761 **Lefebvre V, Fortabat M-N, Ducamp A, North HM, Maia-Grondard A, Trouverie J,**  
762 **Boursiac Y, Mouille G, Durand-Tardif M.** 2011. *ESKIMO1* disruption in *Arabidopsis* alters  
763 vascular tissue and impairs water transport. *PLoS One* **6**.
- 764 **Li B, Dewey CN.** 2011. RSEM: accurate transcript quantification from RNA-Seq data with or  
765 without a reference genome. *J BMC bioinformatics* **12**, 323.
- 766 **Li B, Zhai X, Cao Y, Zhao H, Wang Z, Liu H, Fan G.** 2018. Transcriptome and small RNA  
767 sequencing analysis revealed roles of PaWB-related miRNAs and genes in *Paulownia fortunei*.  
768 *Forests* **9**, 397.
- 769 **Li E, Bhargava A, Qiang W, Friedmann MC, Forneris N, Savidge RA, Johnson LA,**  
770 **Mansfield SD, Ellis BE, Douglas CJ.** 2012. The Class II *KNOX* gene *KNAT7* negatively  
771 regulates secondary wall formation in *Arabidopsis* and is functionally conserved in *Populus*.  
772 *New Phytologist* **194**, 102-115.
- 773 **Li P, Oda J.** 2007. Flame retardancy of paulownia wood and its mechanism. *J Journal of*  
774 *Materials Science* **42**, 8544-8550.

- 775 **Li Y, Fan G, Dong Y, Zhao Z, Deng M, Cao X, Xu E, Niu S.** 2014. Identification of genes  
776 related to the phenotypic variations of a synthesized Paulownia (*Paulownia tomentosa* x  
777 *Paulownia fortunei*) autotetraploid. *Gene* **553**, 75-83.
- 778 **Liners F, Gaspar T, Van Cutsem P.** 1994. Acetyl- and methyl-esterification of pectins of  
779 friable and compact sugar-beet calli: consequences for intercellular adhesion. *Planta* **192**, 545-  
780 556.
- 781 **Liu R, Dong Y, Fan G, Zhao Z, Deng M, Cao X, Niu S.** 2013. Discovery of genes related to  
782 witches broom disease in *Paulownia tomentosa* x *Paulownia fortunei* by a *De Novo* assembled  
783 transcriptome. *PLoS One* **8**, e80238.
- 784 **Livak KJ, Schmittgen TD.** 2001. Analysis of relative gene expression data using real-time  
785 quantitative PCR and the  $2^{-\Delta\Delta CT}$  method. *methods* **25**, 402-408.
- 786 **Ma S, Dong W, Lyu T, Lyu Y.** 2019. An RNA sequencing transcriptome analysis and  
787 development of EST-SSR markers in Chinese hawthorn through Illumina sequencing. *Forests*  
788 **10**, 82.
- 789 **Matsumoto-Kitano M, Kusumoto T, Tarkowski P, Kinoshita-Tsujimura K, Václavíková K,**  
790 **Miyawaki K, Kakimoto T.** 2008. Cytokinins are central regulators of cambial activity.  
791 *Proceedings of the National Academy of Sciences* **105**, 20027-20031.
- 792 **Mauseth JD.** 1988. Plant anatomy. The benjamin/cummings, 31-32,343,358.
- 793 **Moreau C, Aksenov N, Lorenzo MG, Segerman B, Funk C, Nilsson P, Jansson S,**  
794 **Tuominen H.** 2005. A genomic approach to investigate developmental cell death in woody  
795 tissues of *Populus* trees. *Genome Biol* **6**, R34.
- 796 **Mou HQ, Lu J, Zhu SF, Lin CL, Tian GZ, Xu X, Zhao WJ.** 2013. Transcriptomic analysis of  
797 *Paulownia* infected by *Paulownia* witches'-broom *Phytoplasma*. *PLoS One* **8**, e77217.
- 798 **Nieminen K, Blomster T, Helariutta Y, Mahonen AP.** 2015. *Vascular Cambium*  
799 *Development*.
- 800 **Nitsch J.** 1957. Photoperiodism in woody plants. *J. Amer. Soc. Hort. Sci.* **70**, 526-544.
- 801 **Niu S, Fan G, Xu E, Deng M, Zhao Z, Dong Y.** 2014. Transcriptome/Degradome-wide  
802 discovery of microRNAs and transcript targets in two *Paulownia australis* genotypes. *PLoS One*  
803 **9**, e106736.
- 804 **Novaes E, Drost DR, Farmerie WG, Pappas GJ, Grattapaglia D, Sederoff RR, Kirst M.**  
805 2008. High-throughput gene and SNP discovery in *Eucalyptus grandis*, an uncharacterized  
806 genome. *BMC Genomics* **9**, 312.
- 807 **Oh S, Park S, Han KH.** 2003. Transcriptional regulation of secondary growth in *Arabidopsis*  
808 *thaliana*. *J Exp Bot* **54**, 2709-2722.



- 809 **Pauly M, Gille S, Liu L, Mansoori N, de Souza A, Schultink A, Xiong G.** 2013.  
810 Hemicellulose biosynthesis. *Planta* **238**, 627-642.
- 811 **Pavy N, Boyle B, Nelson C, Paule C, Giguere I, Caron S, Parsons LS, Dallaire N, Bedon F,**  
812 **Berube H, Cooke J, Mackay J.** 2008. Identification of conserved core xylem gene sets: conifer  
813 cDNA microarray development, transcript profiling and computational analyses. *New Phytol*  
814 **180**, 766-786.
- 815 **Perrin RM, DeRocher AE, Bar-Peled M, Zeng W, Norambuena L, Orellana A, Raikhel**  
816 **NV, Keegstra K.** 1999. Xyloglucan fucosyltransferase, an enzyme involved in plant cell wall  
817 biosynthesis. *Science* **284**, 1976-1979.
- 818 **Pines J.** 2011. Cubism and the cell cycle: the many faces of the APC/C. *Nature reviews*  
819 *molecular cell biology* **12**, 427-438.
- 820 **Powell W, Machray GC, Provan J.** 1996. Polymorphism revealed by simple sequence repeats.  
821 *Trends in plant science* **1**, 215-222.
- 822 **Qiu Z, He Y, Zhang Y, Guo J, Zhang L.** 2018. Genome-wide identification and profiling of  
823 microRNAs in *Paulownia tomentosa* cambial tissues in response to seasonal changes. *Gene* **677**,  
824 32-40.
- 825 **Quang TH, Hallingbäck H, Gyllenstrand N, von Arnold S, Clapham D.** 2012. Expression of  
826 genes of cellulose and lignin synthesis in *Eucalyptus urophylla* and its relation to some economic  
827 traits. *Trees* **26**, 893-901.
- 828 **Saminathan T, Nimmakayala P, Manohar S, Malkaram S, Almeida A, Cantrell R,**  
829 **Tomason Y, Abburi L, Rahman MA, Vajja VG.** 2014. Differential gene expression and  
830 alternative splicing between diploid and tetraploid watermelon. *Journal of experimental botany*  
831 **66**, 1369-1385.
- 832 **Samuels A, Kaneda M, Rensing KH.** 2006. The cell biology of wood formation: from cambial  
833 divisions to mature secondary xylem. *Botany* **84**, 631-639.
- 834 **Sarkan K, Hergeht H.** 1971. Classification and distribution in definition and nomenclature in  
835 lignins: occurrence, formation, structure and reactions [J]. *Tappi* **50**, 583-590.
- 836 **Sarvas R.** 1970. Genetical adaptation of forest trees to the heat factor of the climate. Second  
837 world consultation on forest tree breeding, Washington, DC, USA, 7-16 August 1969. **1**, 187-  
838 202.
- 839 **Savidge RA.** 1983. The role of plant hormones in higher plant cellular differentiation. II.  
840 Experiments with the vascular cambium, and sclereid and tracheid differentiation in the pine,  
841 *Pinus contorta*. *The Histochemical journal* **15**, 447-466.
- 842 **Schrader J, Moyle R, Bhalerao R, Hertzberg M, Lundeberg J, Nilsson P, Bhalerao RP.**  
843 2004. Cambial meristem dormancy in trees involves extensive remodelling of the transcriptome.  
844 *The Plant Journal* **40**, 173-187.



- 845 **Sedeer E-S, Nabil E-S.** 2003. The paulownia tree an alternative for sustainable forestry.  
846 [www.cropdevelopment.org](http://www.cropdevelopment.org).
- 847 **Shahinnia F, Sayed-Tabatabaei BE.** 2009. Conversion of barley SNPs into PCR-based markers  
848 using dCAPS method. *Genetics and molecular biology* **32**, 564-567.
- 849 **Shim D, Ko J-H, Kim W-C, Wang Q, Keathley DE, Han K-H.** 2014. A molecular framework  
850 for seasonal growth-dormancy regulation in perennial plants. *Horticulture Research* **1**, 14059.
- 851 **Song J, Lu S, Chen Z-Z, Lourenco R, Chiang VL.** 2006. Genetic transformation of *Populus*  
852 *trichocarpa* genotype Nisqually-1: a functional genomic tool for woody plants. *Plant and cell*  
853 *physiology* **47**, 1582-1589.
- 854 **Stepanova AN, Robertson-Hoyt J, Yun J, Benavente LM, Xie D-Y, Doležal K, Schlereth A,**  
855 **Jürgens G, Alonso JM.** 2008. *TAA1*-mediated auxin biosynthesis is essential for hormone  
856 crosstalk and plant development. *Cell* **133**, 177-191.
- 857 **Stepanova AN, Yun J, Robles LM, Novak O, He W, Guo H, Ljung K, Alonso JM.** 2011. The  
858 *Arabidopsis* YUCCA1 flavin monooxygenase functions in the indole-3-pyruvic acid branch of  
859 auxin biosynthesis. *The Plant Cell* **23**, 3961-3973.
- 860 **Stewart WM, Vaidya BN, Mahapatra AK, Terrill TH, Joshee N.** 2018. Potential use of  
861 multipurpose *Paulownia elongata* tree as an animal feed resource. *American Journal of Plant*  
862 *Sciences* **9**, 1212.
- 863 **Sundberg B, Ugglä C, Tuominen H, Savidge R, Barnett J, Napier R.** 2000. Cell and  
864 Molecular Biology of Wood Formation. BIOS Scientific Publishers, Oxford, 169-188.
- 865 **Tarazona S, Garcia-Alcalde F, Dopazo J, Ferrer A, Conesa A.** 2011. Differential expression  
866 in RNA-seq: a matter of depth. *Genome Res* **21**, 2213-2223.
- 867 **Tisserat B, Joshee N, Mahapatra AK, Selling GW, Finkenstadt VL.** 2013a. Physical and  
868 mechanical properties of extruded poly (lactic acid)-based *Paulownia elongata* biocomposites.  
869 *Industrial Crops and Products* **44**, 88-96.
- 870 **Tisserat B, Reifschneider L, Joshee N, Finkenstadt VL.** 2013b. Properties of high density  
871 polyethylene-*Paulownia* wood flour composites via injection molding. *BioResources* **8**, 4440-  
872 4458.
- 873 **Tisserat B, Reifschneider L, Joshee N, Finkenstadt VL.** 2015. Evaluation of *Paulownia*  
874 *elongata* wood polyethylene composites. *Journal of Thermoplastic Composite Materials* **28**,  
875 1301-1320.
- 876 **Turcotte A, Morin H, Krause C, Deslauriers A, Thibeault-Martel M.** 2009. The timing of  
877 spring rehydration and its relation with the onset of wood formation in black spruce. *Agricultural*  
878 *and Forest Meteorology* **149**, 1403-1409.

- 879 **Turner SR, Somerville CR.** 1997. Collapsed xylem phenotype of *Arabidopsis* identifies  
880 mutants deficient in cellulose deposition in the secondary cell wall. *The Plant Cell* **9**, 689-701.
- 881 **Van Acker R, Déjardin A, Desmet S, Hoengenaert L, Vanholme R, Morreel K, Laurans F,**  
882 **Kim H, Santoro N, Foster C.** 2017. Different routes for conifer- and sinapaldehyde and higher  
883 saccharification upon deficiency in the dehydrogenase CAD1. *Plant Physiology* **175**, 1018-1039.
- 884 **Vanzin GF, Madson M, Carpita NC, Raikhel NV, Keegstra K, Reiter W-D.** 2002. The *mur2*  
885 mutant of *Arabidopsis thaliana* lacks fucosylated xyloglucan because of a lesion in  
886 fucosyltransferase *AtFUT1*. *Proceedings of the National Academy of Sciences* **99**, 3340-3345.
- 887 **Varshney RK, Graner A, Sorrells ME.** 2005. Genic microsatellite markers in plants: features  
888 and applications. *TRENDS in Biotechnology* **23**, 48-55.
- 889 **Vaughn SF, Dinelli FD, Tisserat B, Joshee N, Vaughan MM, Peterson SC.** 2015. Creeping  
890 bentgrass growth in sand-based root zones with or without biochar. *Scientia Horticulturae* **197**,  
891 592-596.
- 892 **Villalobos DP, Díaz-Moreno SM, Said E-SS, Cañas RA, Osuna D, Van Kerckhoven SH,**  
893 **Bautista R, Claros MG, Cánovas FM, Cantón FR.** 2012. Reprogramming of gene expression  
894 during compression wood formation in pine: coordinated modulation of S-adenosylmethionine,  
895 lignin and lignan related genes. *BMC plant biology* **12**, 100.
- 896 **Wang C, Wang Y, Diao G, Jiang J, Yang C.** 2010. Isolation and characterization of expressed  
897 sequence tags (ESTs) from cambium tissue of birch (*Betula platyphylla* Suk). *Plant molecular*  
898 *biology reporter* **28**, 438-449.
- 899 **Wang J, Wang H, Deng T, Liu Z, Wang X.** 2019. Time-coursed transcriptome analysis  
900 identifies key expressional regulation in growth cessation and dormancy induced by short days in  
901 *Paulownia*. *Scientific reports* **9**, 1-14.
- 902 **Wang M, Qi X, Zhao S, Zhang S, Lu M-Z.** 2009. Dynamic changes in transcripts during  
903 regeneration of the secondary vascular system in *Populus tomentosa* Carr. revealed by cDNA  
904 microarrays. *BMC Genomics* **10**, 215.
- 905 **Wang Z, Yu G, Shi B, Wang X, Qiang H, Gao H.** 2014. Development and characterization of  
906 simple sequence repeat (SSR) markers based on RNA-sequencing of *Medicago sativa* and in  
907 silico mapping onto the *M. truncatula* genome. *PLoS One* **9**, e92029.
- 908 **Wilkins O, Nahal H, Foong J, Provart NJ, Campbell MM.** 2009. Expansion and  
909 diversification of the *Populus* R2R3-MYB family of transcription factors. *Plant Physiology* **149**,  
910 981-993.
- 911 **Won C, Shen X, Mashiguchi K, Zheng Z, Dai X, Cheng Y, Kasahara H, Kamiya Y, Chory**  
912 **J, Zhao Y.** 2011. Conversion of tryptophan to indole-3-acetic acid by TRYPTOPHAN  
913 AMINOTRANSFERASES OF *ARABIDOPSIS* and YUCCAs in *Arabidopsis*. *Proceedings of the*  
914 *National Academy of Sciences* **108**, 18518-18523.

- 915 **Xu E, Fan G, Niu S, Zhao Z, Deng M, Dong Y.** 2014. Transcriptome-wide profiling and  
916 expression analysis of diploid and autotetraploid *Paulownia tomentosa*× *Paulownia fortunei*  
917 under drought stress. PLoS One **9**, e113313.
- 918 **Yadav NK, Vaidya BN, Henderson K, Lee JF, Stewart WM, Dhekney SA, Joshee N.** 2013.  
919 A review of *Paulownia* biotechnology: a short rotation, fast growing multipurpose bioenergy  
920 tree. American Journal of Plant Sciences **4**, 2070.
- 921 **Yan X, Liu J, Kim H, Liu B, Huang X, Yang Z, Lin YCJ, Chen H, Yang C, Wang JP.** 2019.  
922 CAD 1 and CCR 2 protein complex formation in monolignol biosynthesis in *Populus*  
923 *trichocarpa*. New Phytologist **222**, 244-260.
- 924 **Ye Z-H, Zhong R.** 2015. Molecular control of wood formation in trees. Journal of experimental  
925 botany **66**, 4119-4131.
- 926 **Zhao H, Li R, Shang F.** 2019. The complete chloroplast genome of *Paulownia elongata* and  
927 phylogenetic implications in Lamiales. Mitochondrial DNA Part B **4**, 2067-2068.
- 928 **Zhao Z, Niu S, Fan G, Deng M, Wang Y.** 2018. Genome-wide analysis of gene and microRNA  
929 expression in diploid and autotetraploid *Paulownia fortunei* (Seem) Hemsl. under drought stress  
930 by transcriptome, microRNA, and degradome sequencing. Forests **9**, 88.
- 931 **Zhong R, Ye Z-H.** 2015. Secondary cell walls: biosynthesis, patterned deposition and  
932 transcriptional regulation. Plant and cell physiology **56**, 195-214.
- 933 **Zhu Y, Song D, Sun J, Wang X, Li L.** 2013. PtrHB7, a class III HD-Zip gene, plays a critical  
934 role in regulation of vascular cambium differentiation in *Populus*. Molecular Plant **6**, 1331-1343.
- 935 **Zhu Z-H, Chao C-J, Lu X-Y, Xiong YG.** 1986. *Paulownia in China: cultivation and*  
936 *utilization*: International Development Research Centre.
- 937
- 938
- 939
- 940
- 941
- 942
- 943
- 944
- 945

946 **Figure Legends:**

947 Figure 1. Paulownia tree growth and sampling of tree twigs. Paulownia Demonstration Plot at  
948 FVSU showing dormant during winter (A) and active growth during spring (B). Cambial tissue  
949 sampling from paulownia twig (C); unopened twig (left), bark removal (middle) and scrapping  
950 wood forming cambial tissue for RNA extraction (right).

951 Figure 2. Statistics of homology search of unigenes against Non-redundant (NR) protein  
952 database. Distribution of top BLASTX hits with cut-off  $e$ -value of  $<1.0 \times 10^{-5}$  (A), similarity (B),  
953 and species distributions (C) of all unigenes.

954 Figure 3. Histogram representation of clusters of orthologous groups (COG). The horizontal  
955 coordinates are function classes of COG, and the vertical coordinates are numbers of unigenes in  
956 one class. The notation on the right is the full name of the functions in X-axis. Histogram  
957 representation of classification of the clusters of orthologous groups (COG) for the total aligned  
958 43,780 unigenes (53.43%) into 25 functional groups.

959 Figure 4. GO classification analysis of unigenes. GO functions is showed in X-axis. The right Y-  
960 axis shows the number of genes which have the GO function, and the left Y-axis shows the  
961 percentage. Unigenes in winter and spring season are classified into biological processes, cellular  
962 component and molecular function. In total 41,588 (50.76% of all unigenes) were assigned to 48  
963 GO categories.

964 Figure 5. GO function analysis of the differentially expressed genes. GO function analysis results  
965 for the differentially expressed genes in cambial tissues due to winter and spring seasons into  
966 biological processes, cellular component and molecular function.

967 Figure 6. Relative mRNA expression of key genes involved in winter and spring seasons.  
968 Expression of genes involved in cell wall synthesis (*CESA3*, *CESA1*, *CESA6*, *CSLC4*, *FUT1*,  
969 *AXY4*, *GATL1*, *IRX10*, *ESKIMO1*, *4CL*, *CCR1*, *CAD1*) and hormone synthesis (*TAA1*, *YUC1*,  
970 *IPT1*). Expression quantity of the calibrator sample (winter tissue) was set to 1. Data are the  
971 mean  $\pm$  SD. Student's  $t$ -test was used to compare significant changes in spring tissues compared  
972 to winter tissues. \*,  $p < 0.1$ ; \*\*,  $p < 0.01$ ; \*\*\*,  $p < 0.001$ ; ns; no significance.

973 Figure 7. Simple Sequence Repeat (SSR) marker variation statistics. Number of motifs are given  
974 against each repeated nucleotide categories from mono-nucleotides to hexa-nucleotides.

975



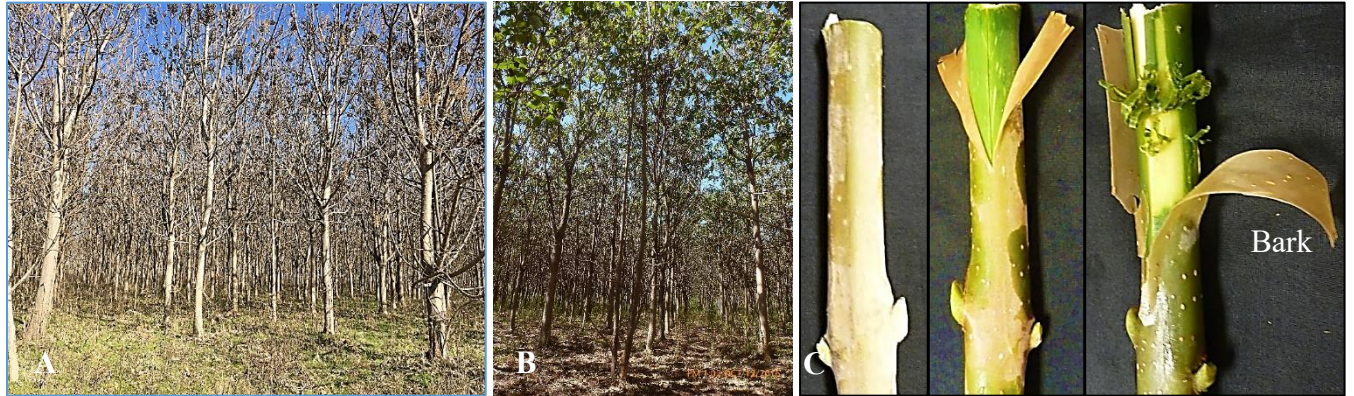

Paulownia tree growth and sampling of tree twigs.



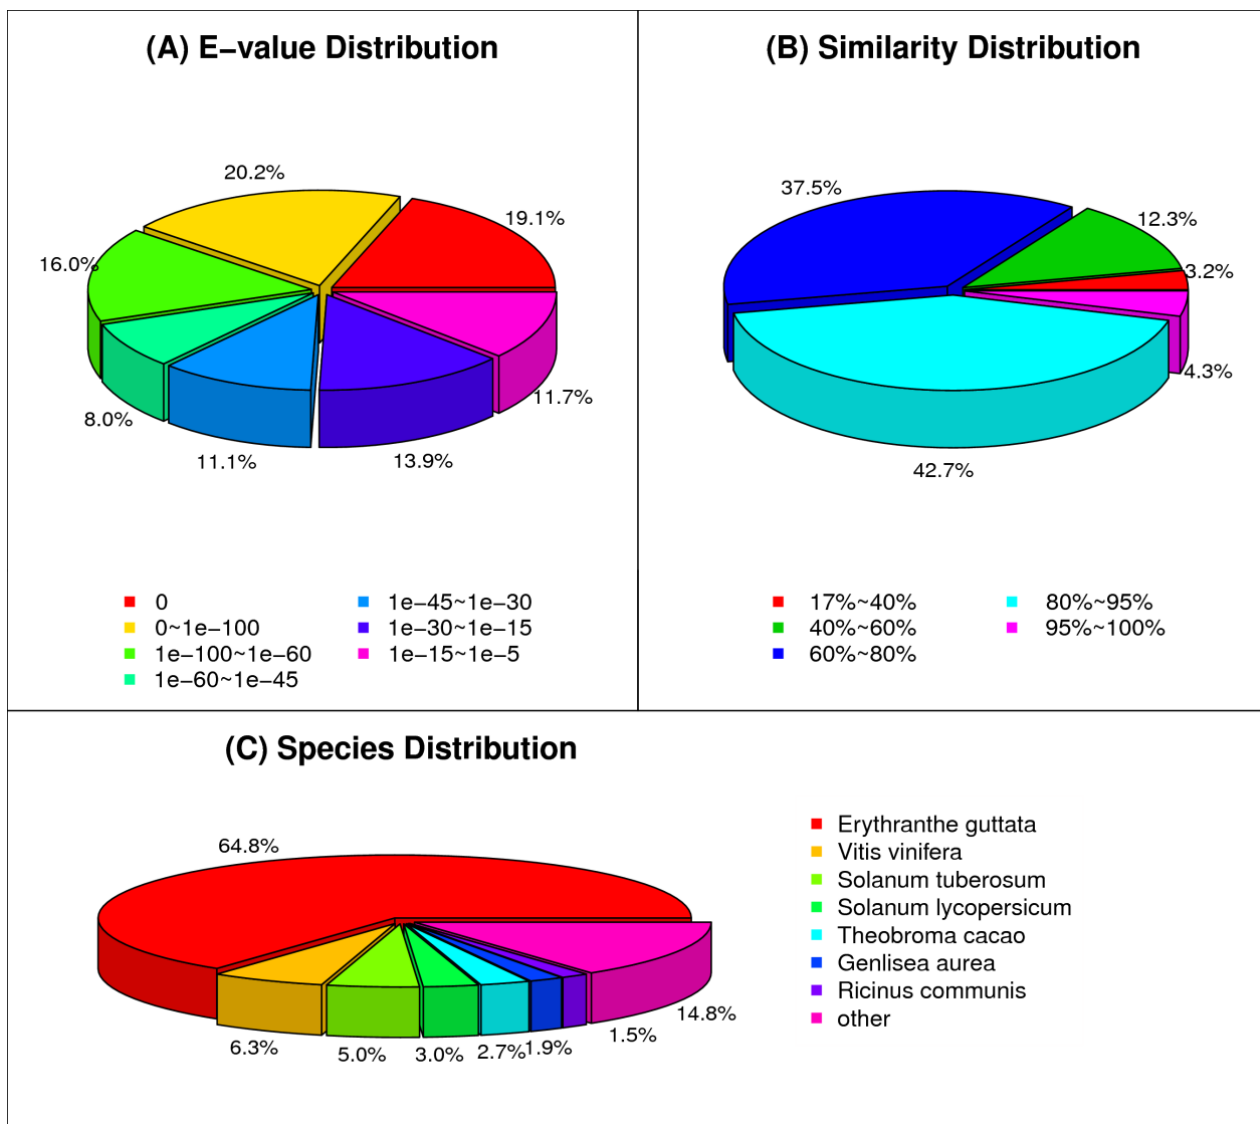

Statistics of homology search of unigenes against Non-redundant (NR) protein database.



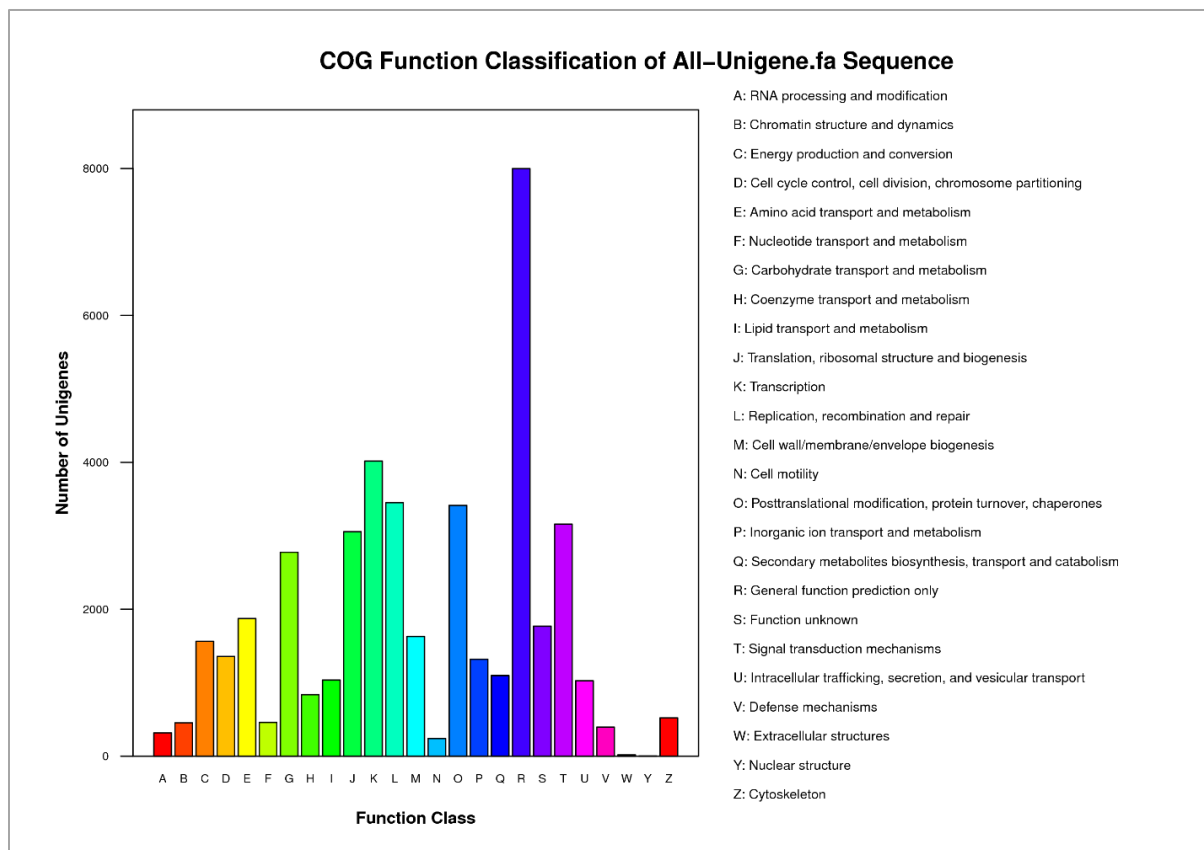

Histogram representation of clusters of orthologous groups (COG).

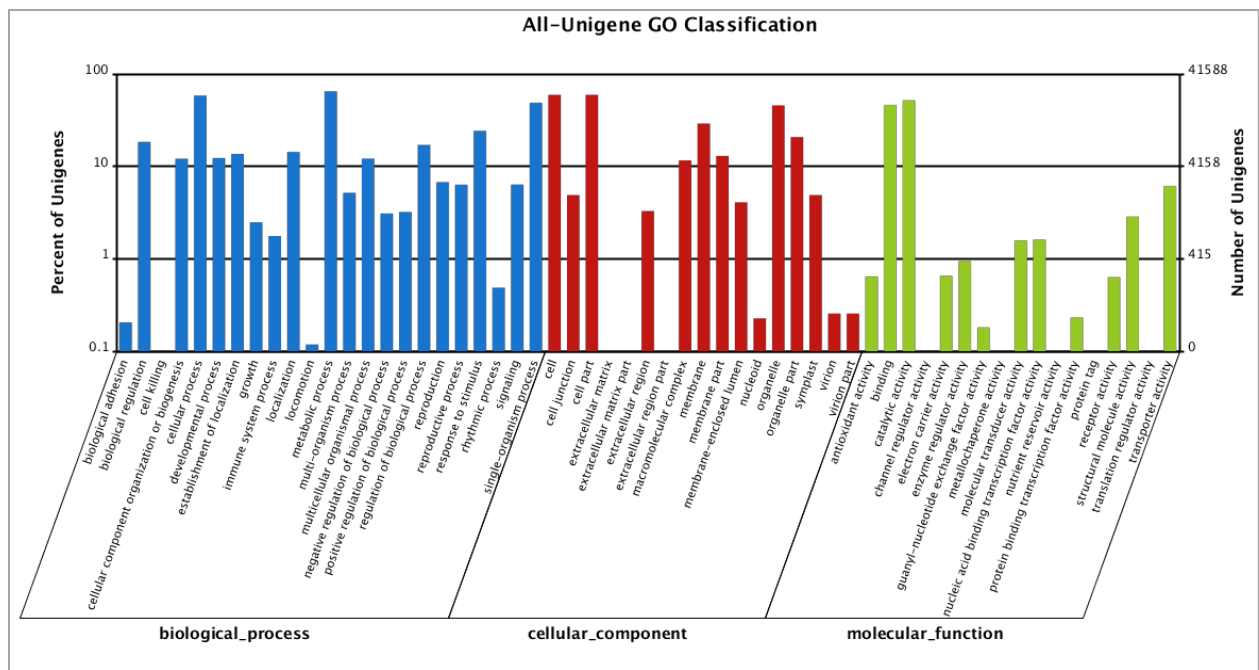

GO classification analysis of unigenes.

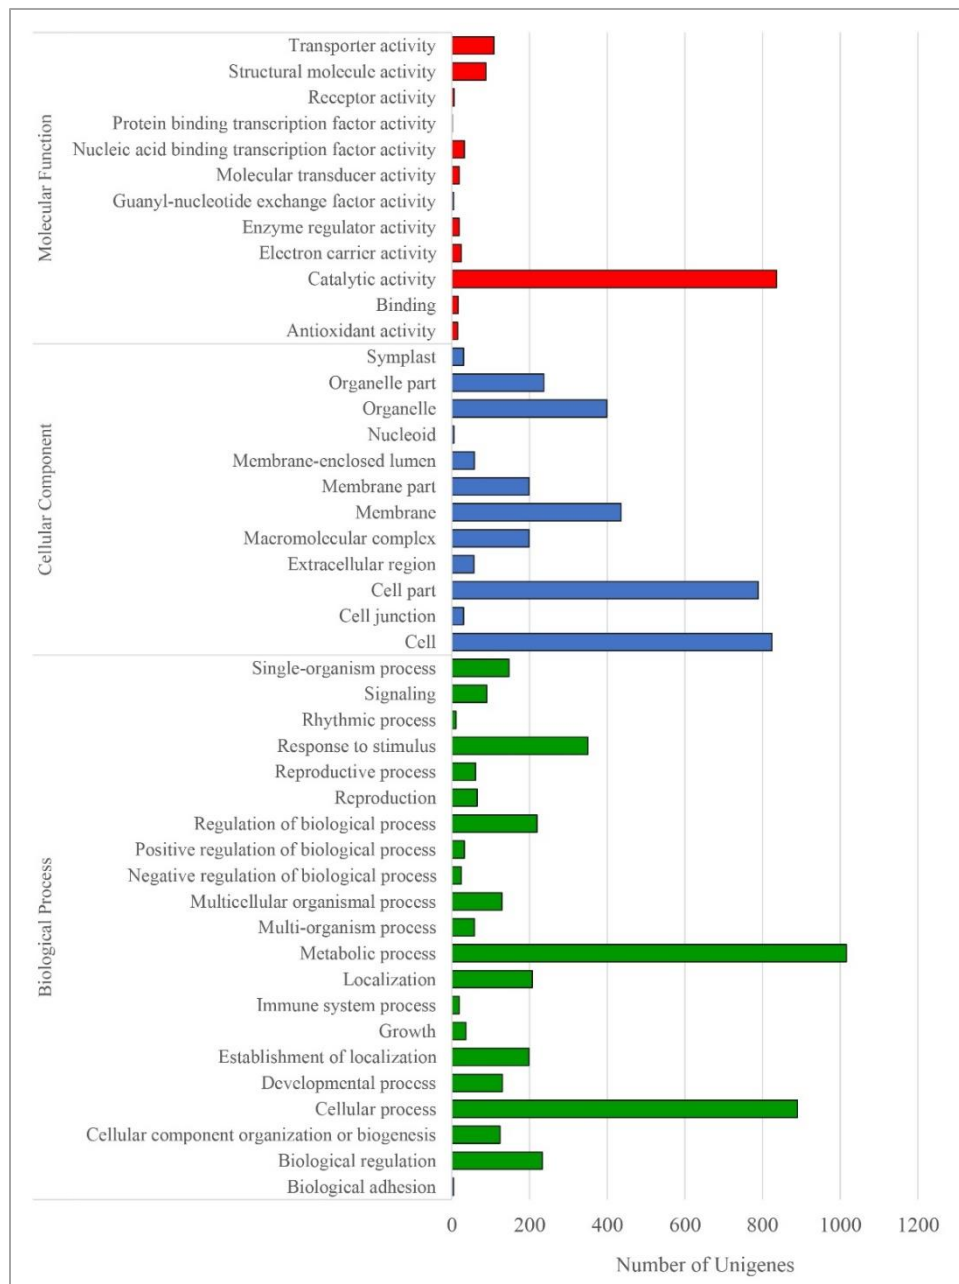

GO function analysis of the differentially expressed genes.

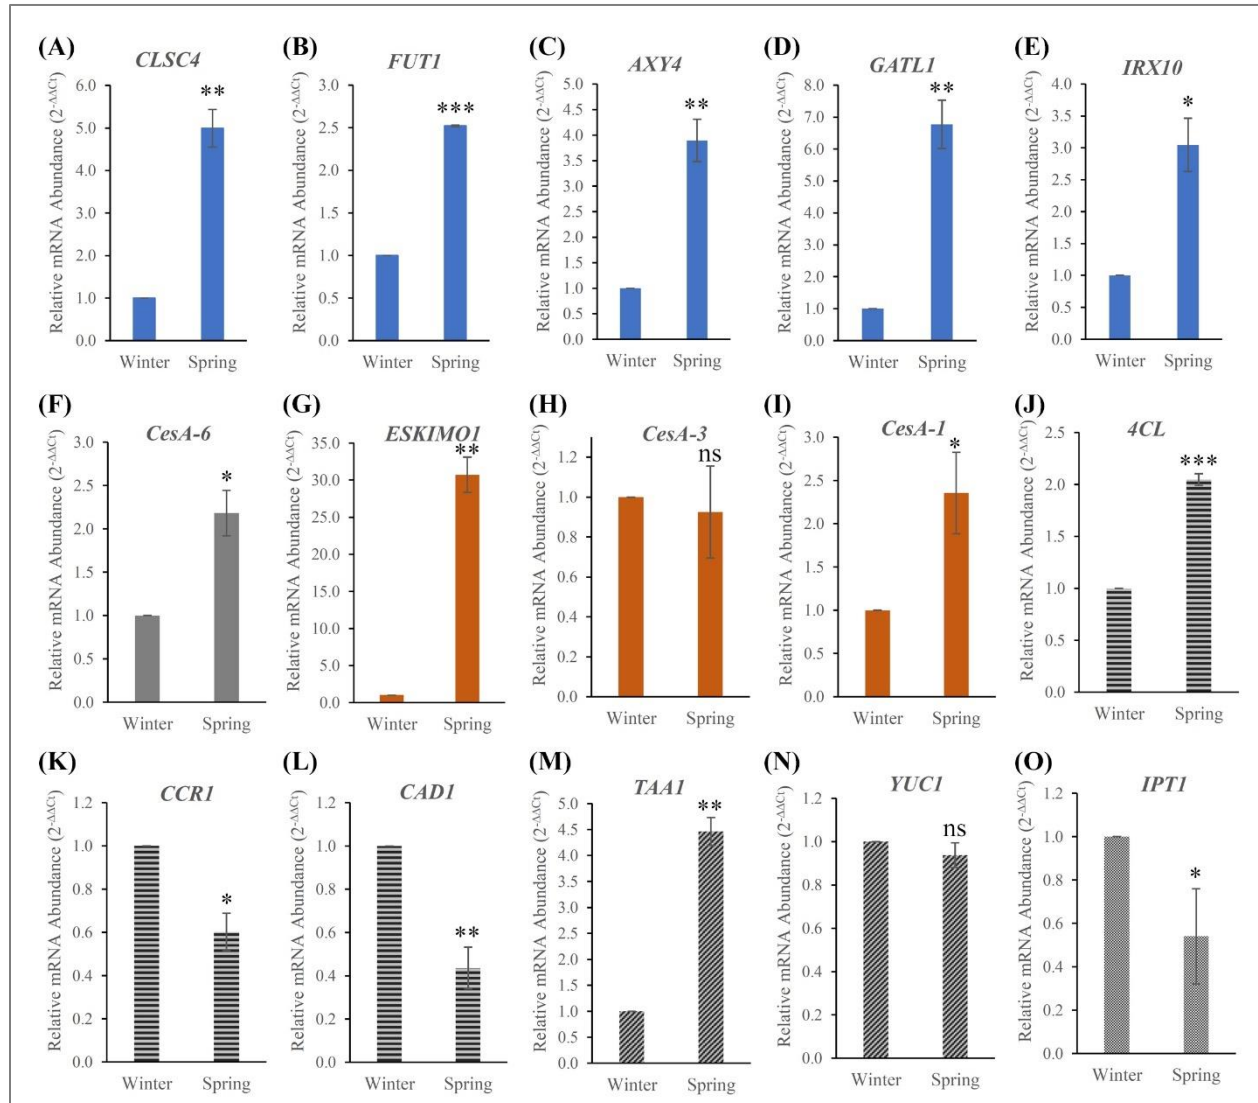

Relative mRNA expression of key genes involved in winter and spring seasons.

## Tables

Table 1. Summary of the sequence assembly after Illumina sequencing and statistics of contigs and unigenes (n=3). The values are given as Mean±SD from three replications.

|                        | Winter Wood          | Spring Wood          |
|------------------------|----------------------|----------------------|
| Total raw reads        | 51,005,253±2,639,904 | 52,359,187±737,515   |
| Total clean reads      | 49,766,422±2,349,991 | 50,689,696±1,090,856 |
| Percentage of reads    | 97.60±0.52           | 96.64±0.63           |
| Q20 Percentage         | 97.96±0.36           | 97.51±0.35           |
| <b><u>Contigs</u></b>  |                      |                      |
| Total Number           | 129,428±610          | 104,388±1779         |
| Total Length (nt)      | 43,730,308±513,387   | 35,501,692±721,304   |
| Mean Length (nt)       | 338±3                | 340±1                |
| N50                    | 605±7                | 642±4                |
| <b><u>Unigenes</u></b> |                      |                      |
| Total Number           | 64,142±1229          | 45,671±1,225         |
| Total Length (nt)      | 61,610,800±2,101,797 | 38,465,680±1,457,846 |
| Mean Length (nt)       | 960±14               | 842±9                |
| N50                    | 1,551±25             | 1,354±22             |

Table 2. List of top 20 upregulated known genes

| Unigene/Contig | Length | WW<br>Expression | SW<br>Expression | log <sub>2</sub> Fold Change<br>(SW/WW) | Probability | Gene                                                       |
|----------------|--------|------------------|------------------|-----------------------------------------|-------------|------------------------------------------------------------|
| Unigene86688   | 995    | 0.01             | 42.67            | 12.06                                   | 0.9997      | Anaphase-promoting complex, cyclosome, subunit 4           |
| Unigene11861   | 477    | 0.01             | 27.14            | 11.41                                   | 0.9994      | Heat shock protein                                         |
| Unigene67440   | 2339   | 0.01             | 17.72            | 10.79                                   | 0.9989      | Phosphoenolpyruvate carboxykinase                          |
| Unigene1612    | 1191   | 0.01             | 11.95            | 10.22                                   | 0.9978      | Cysteine-type peptidase activity                           |
| Unigene3797    | 247    | 0.01             | 8.11             | 9.66                                    | 0.9953      | Calcium-binding domain                                     |
| Unigene10820   | 977    | 0.03             | 24.79            | 9.54                                    | 0.9992      | Class IV heat shock protein                                |
| Unigene17843   | 560    | 0.01             | 6.50             | 9.34                                    | 0.9926      | Pericarp peroxidase                                        |
| Unigene1476    | 971    | 0.01             | 6.17             | 9.27                                    | 0.9918      | Sulfated surface glycoprotein                              |
| Unigene11860   | 940    | 0.10             | 58.64            | 9.24                                    | 0.9996      | Class I heat shock protein                                 |
| Unigene34010   | 359    | 0.01             | 5.87             | 9.20                                    | 0.9910      | Photosystem II oxygen-evolving complex protein 2 precursor |
| Unigene15576   | 532    | 0.01             | 5.42             | 9.08                                    | 0.9893      | Gibberellin-regulated protein                              |
| Unigene35083   | 779    | 0.82             | 359.96           | 8.78                                    | 0.9995      | Heat shock protein                                         |
| Unigene1551    | 276    | 0.01             | 4.14             | 8.69                                    | 0.9814      | Large subunit ribosomal protein                            |
| Unigene8720    | 500    | 0.01             | 4.08             | 8.67                                    | 0.9808      | Actin-depolymerizing factor                                |
| Unigene19860   | 1028   | 0.01             | 4.01             | 8.65                                    | 0.9801      | Leucine-rich repeat extensin                               |
| Unigene4065    | 510    | 0.01             | 4.00             | 8.64                                    | 0.9801      | Actin depolymerisation factor                              |
| Unigene4063    | 527    | 0.06             | 23.35            | 8.60                                    | 0.9986      | Aquaporin P1P2                                             |
| Unigene3966    | 521    | 0.01             | 3.62             | 8.50                                    | 0.9754      | Tubulin/FtsZ family                                        |
| Unigene8766    | 606    | 0.01             | 3.59             | 8.49                                    | 0.9750      | Class II heat shock protein                                |
| Unigene11017   | 503    | 0.01             | 3.54             | 8.47                                    | 0.9742      | Cyclophilin peptidyl-prolyl cis-trans isomerase            |



Table 3. List of top 20 downregulated genes

| Unigene/Contig | Length | WW<br>Expression | SW<br>Expression | log2Fold<br>Change<br>(SW/WW) | Probability | Gene                                          |
|----------------|--------|------------------|------------------|-------------------------------|-------------|-----------------------------------------------|
| Unigene22837   | 205    | 73.99            | 0.01             | -12.85                        | 0.9998      | Galactinol synthase                           |
| Unigene6926    | 252    | 21.15            | 0.01             | -11.05                        | 0.9991      | MATE efflux family protein                    |
| CL7319.Contig2 | 890    | 16.20            | 0.01             | -10.66                        | 0.9987      | Coproporphyrinogen-III oxidase                |
| Unigene13375   | 584    | 14.56            | 0.01             | -10.51                        | 0.9985      | Rosmarinate synthase                          |
| Unigene10966   | 1645   | 11.55            | 0.01             | -10.17                        | 0.9977      | Receptor-like protein kinase                  |
| Unigene10726   | 1857   | 8.84             | 0.01             | -9.79                         | 0.9961      | Valencene synthase                            |
| CL698.Contig3  | 3901   | 6.65             | 0.01             | -9.38                         | 0.9929      | Pectin methyltransferase                      |
| CL8528.Contig1 | 1476   | 6.63             | 0.01             | -9.37                         | 0.9929      | Root phototropism protein                     |
| CL7708.Contig2 | 888    | 6.54             | 0.01             | -9.35                         | 0.9927      | Splicing factor U2af large subunit            |
| CL889.Contig1  | 1018   | 6.46             | 0.01             | -9.33                         | 0.9925      | Tropinone reductase homolog                   |
| CL7009.Contig1 | 1844   | 6.39             | 0.01             | -9.32                         | 0.9924      | Auxin efflux carrier family protein           |
| Unigene13264   | 1617   | 6.04             | 0.01             | -9.24                         | 0.9915      | Ethylene-responsive transcription factor      |
| Unigene15599   | 228    | 5.86             | 0.01             | -9.20                         | 0.9909      | Nitrate transporter                           |
| CL8637.Contig1 | 863    | 4.75             | 0.01             | -8.89                         | 0.9859      | DNA repair protein Rada                       |
| CL799.Contig5  | 3446   | 4.72             | 0.01             | -8.88                         | 0.9857      | Serine/threonine-protein kinase               |
| Unigene1474    | 1021   | 4.55             | 0.01             | -8.83                         | 0.9845      | Xanthoxin dehydrogenase                       |
| Unigene25603   | 518    | 4.52             | 0.01             | -8.82                         | 0.9844      | SPX domain-containing membrane protein        |
| Unigene6422    | 1304   | 45.72            | 0.10             | -8.79                         | 0.9993      | Ethylene-responsive transcription factor      |
| CL822.Contig5  | 1916   | 4.24             | 0.01             | -8.73                         | 0.9823      | Putative dual specificity protein phosphatase |
| Unigene13350   | 451    | 4.13             | 0.01             | -8.69                         | 0.9813      | CBL-interacting protein kinase                |

Table 4. Top 25 DEG enriched KEGG pathways.

| Pathway                                     | Number of DEGs genes | <i>p</i> -value | Pathway ID |
|---------------------------------------------|----------------------|-----------------|------------|
| Metabolic pathways                          | 1387                 | 1.32E-12        | ko01100    |
| Biosynthesis of secondary metabolites       | 827                  | 7.55E-10        | ko01110    |
| Plant hormone signal transduction           | 320                  | 1.58E-05        | ko04075    |
| Plant-pathogen interaction                  | 266                  | 0.2430222       | ko04626    |
| Ribosome                                    | 204                  | 0.200625        | ko03010    |
| Spliceosome                                 | 178                  | 0.9468082       | ko03040    |
| Starch and sucrose metabolism               | 172                  | 1.22E-06        | ko00500    |
| Protein processing in E.R.                  | 162                  | 0.3255727       | ko04141    |
| Carbon metabolism                           | 161                  | 0.04321163      | ko01200    |
| RNA transport                               | 151                  | 0.986695        | ko03013    |
| Glycerophospholipid metabolism              | 138                  | 0.1244536       | ko00564    |
| Endocytosis                                 | 134                  | 0.6458048       | ko04144    |
| Biosynthesis of amino acids                 | 123                  | 0.7258124       | ko01230    |
| Glycolysis / Gluconeogenesis                | 115                  | 5.48E-05        | ko00010    |
| Phenylpropanoid biosynthesis                | 106                  | 1.50E-06        | ko00940    |
| Circadian rhythm - plant                    | 105                  | 5.10E-09        | ko04712    |
| Ether lipid metabolism                      | 104                  | 0.02664109      | ko00565    |
| Ubiquitin mediated proteolysis              | 99                   | 0.7266876       | ko04120    |
| Pentose and glucuronate interconversions    | 93                   | 1.57E-05        | ko00040    |
| Purine metabolism                           | 92                   | 0.9911015       | ko00230    |
| Amino sugar and nucleotide sugar metabolism | 86                   | 0.006516035     | ko00520    |
| Pyrimidine metabolism                       | 78                   | 0.992583        | ko00240    |
| mRNA surveillance pathway                   | 77                   | 0.9938776       | ko03015    |
| Flavonoid biosynthesis                      | 70                   | 8.18E-07        | ko00941    |
| RNA degradation                             | 68                   | 0.940714        | ko03018    |

Table 5: Wood-Forming Genes Selected for RT-qPCR Expression Validation

| Gene name      | Unigene/contig | Macromolecule | Enzyme/Protein Name                                    | Activity             | Function                                                                                       |
|----------------|----------------|---------------|--------------------------------------------------------|----------------------|------------------------------------------------------------------------------------------------|
| <i>CESA3</i>   | Unigene9908    | Cellulose     | Cellulose synthase A catalytic subunit 3 [UDP-forming] | Cellulose synthase   | Catalytic subunit of cellulose synthase terminal complexes, required for cell wall formation.  |
| <i>CESA1</i>   | Unigene21132   | ”             | ”                                                      | ”                    | ”                                                                                              |
| <i>CESA6</i>   | Unigene13924   | ”             | ”                                                      | ”                    | ”                                                                                              |
| <i>CSLC4</i>   | CL7362.Contig2 | Hemicellulose | Xyloglucan glycosyltransferase 4                       | Glucan synthesis     | Involved in the synthesis of the xyloglucan backbone                                           |
| <i>FUT1</i>    | Unigene2841    | Hemicellulose | Galactoside 2-alpha-L-fucosyltransferase               | Fucosyl transferase  | Addition of the terminal fucosyl residue on xyloglucan side chains                             |
| <i>AXY4</i>    | Unigene14391   | Hemicellulose | Protein ALTERED XYLOGLUCAN 4                           | Acetyl transferase   | Involved in xyloglucan specific O-acetylation in roots and rosette leaves                      |
| <i>GATL1</i>   | Unigene14440   | Hemicellulose | Galacturonosyltransferase-like 1                       | Xylan synthase       | Family 8 glycosyl transferase that contributes to xylan biosynthesis                           |
| <i>IRX10</i>   | Unigene2644    | Hemicellulose | Beta-1,4-xylosyltransferase                            | Xylan synthase       | Synthesis of the hemicellulose glucuronoxylan, a major component of secondary cell walls       |
| <i>ESKIMO1</i> | CL7514.Contig1 | Hemicellulose | Protein ESKIMO 1                                       | Acetyl transferase   | Xylan acetyltransferase required for 2-O- and 3-O-monoacetylation of xylosyl residues in xylan |
| <i>4CL</i>     | CL764.Contig3  | Lignin        | 4-coumarate--CoA ligase 1                              | Monolignol synthesis | Produces CoA thioesters of a variety of hydroxy- and methoxy-substituted cinnamic acids.       |
| <i>CCR1</i>    | CL6693.Contig1 | Lignin        | Cinnamoyl-CoA reductase 1                              | Monolignol synthesis | Involved in monolignol biosynthesis, the conversion of cinnamoyl-CoAs into cinnamaldehydes.    |

|             |                |           |                                                   |                      |                                                                                                            |
|-------------|----------------|-----------|---------------------------------------------------|----------------------|------------------------------------------------------------------------------------------------------------|
| <i>CADI</i> | Unigene17183   | Lignin    | Cinnamyl alcohol dehydrogenase 1                  | Monolignol synthesis | Involved in lignin biosynthesis. Catalyzes the final step specific for the production of lignin monomers.  |
| <i>TA41</i> | CL8952.Contig1 | Auxin     | L-tryptophan--pyruvate aminotransferase 1         | Auxin synthesis      | Performs first two reactions in auxin pathway.                                                             |
| <i>YUC1</i> | CL1596.Contig1 | Auxin     | Indole-3-pyruvate monooxygenase YUCCA1            | Auxin synthesis      | Catalyzes the N-oxidation of tryptamine to form N-hydroxyl tryptamine.                                     |
| <i>IPT1</i> | Unigene8131    | Cytokinin | Adenylate isopentenyltransferase 1, chloroplastic | Cytokinin synthesis  | Catalyzes the transfer of an isopentenyl group from dimethylallyl diphosphate (DMAPP) to ATP, ADP and AMP. |
